# Supplementary material for: Synthetic and mechanistic studies of the multicomponent reaction of 2-(phenylethynyl)benzaldehyde, primary amine and diphenylphosphine oxide
Source: Royal Society of Chemistry journal article supplement (doi:10.1039/d4re00387j), 2024-01-01
Supplement: d4re00387j1.pdf [file d4re00387j1.pdf]

Supporting Information

for

**Synthetic and mechanistic studies of the multicomponent reaction of  
2-(phenylethynyl)benzaldehyde, primary amine and diphenylphosphine  
oxide**

Kármén Szabó,<sup>a</sup> Zsolt Kelemen,<sup>b</sup> Pál Tamás Szabó<sup>c</sup> and Erika Bálint<sup>a\*</sup>

<sup>a</sup> *Department of Organic Chemistry and Technology, Faculty of Chemical Technology and  
Biotechnology, Budapest University of Technology and Economics, Műegyetem rkp. 3.,  
H-1111 Budapest, Hungary*

<sup>b</sup> *Department of Inorganic and Analytical Chemistry, Faculty of Chemical Technology and  
Biotechnology, Budapest University of Technology and Economics, Műegyetem rkp. 3.,  
H-1111 Budapest, Hungary*

<sup>c</sup> *MS Metabolomic Research Laboratory, Centre for Structural Science, HUN-REN  
Hungarian Research Network, Magyar tudósok krt. 2., H-1117 Budapest, Hungary*

*\*Correspondence: balint.erika@vbk.bme.hu*

## Table of contents

|                                                                       |     |
|-----------------------------------------------------------------------|-----|
| Experimental section                                                  | S3  |
| General procedures for the synthesis                                  | S4  |
| Computational details                                                 | S6  |
| $^1\text{H}$ NMR, $^{13}\text{C}$ NMR and $^{31}\text{P}$ NMR data    | S8  |
| $^1\text{H}$ NMR, $^{13}\text{C}$ NMR and $^{31}\text{P}$ NMR spectra | S10 |
| XYZ coordinates and total energies of the investigated systems        | S18 |
| References                                                            | S59 |

## Experimental section

### Materials and instrumentation

All starting materials were purchased from commercial sources and were used without further purification.

The reactions under conventional heating were carried out in an oil bath.

High-performance liquid chromatography-mass spectrometry (HPLC-MS) measurements were performed with an Agilent 1200 liquid chromatography system coupled with a 6130-quadrupole mass spectrometer equipped with an ESI ion source (Agilent Technologies, Palo Alto, CA, USA). Analysis was performed at 40 °C on a Gemini C18 column (150 mm × 4.6 mm, 3 μm; Phenomenex, Torrance, CA, USA) with a mobile phase flow rate of 0.6 mL/min. Composition of eluent A was 0.1% (NH<sub>4</sub>)(HCOO) in water; eluent B was 0.1% (NH<sub>4</sub>)(HCOO) and 8% water in acetonitrile, 0–3 min 5% B, 3–13 min gradient, 13–20 min 100% B. The injection volume was 2 μL. The chromatographic profile was registered at 254 nm. The MSD operating parameters were as follows: positive ionization mode, scan spectra from m/z 120 to 1000, drying gas temperature 300 °C, nitrogen flow rate 12 L/min, nebulizer pressure 60 psi, capillary voltage 4000 V.

High resolution mass spectrometric measurements were performed using a Sciex 5600+ Q-TOF mass spectrometer in positive electrospray mode.

The <sup>1</sup>H, <sup>13</sup>C and <sup>31</sup>P NMR spectra were taken in CDCl<sub>3</sub> solution on a Bruker AV-300 spectrometer operating at 300, 75.5 and 121.5 MHz, respectively. The chemical shifts (δ) are reported in parts per million (ppm) and downfield relative to 85% H<sub>3</sub>PO<sub>4</sub>, as well as TMS, the coupling constants (*J*) are reported in Hz.

### **General procedure for the synthesis of $\alpha$ -amino(2-alkynylphenyl)methylphosphine oxides (7a and 7b)**

To the mixture of 1.0 mmol (0.21 g) of 2-(phenylethynyl)benzaldehyde, 1.0 mmol of primary amine (butylamine: 0.10 mL or aniline: 0.09 mL), and 1.0 mmol (0.20 g) of diphenylphosphine oxide were added 2 mL of solvent (ethanol, toluene, ethyl acetate or acetonitrile). The reaction mixture was stirred at 25 °C for 10–240 min on a magnetic stirrer. At the end of the reaction, the solvent was removed in vacuum and the reaction mixtures were analyzed by  $^{31}\text{P}$  NMR spectroscopy and HPLC-MS. The  $\alpha$ -amino(2-alkynylphenyl)methylphosphine oxides were obtained by column chromatography using silica gel as the absorbent and hexane:ethyl acetate (6:4) as the eluent.

### **General procedure for the catalyst screening of the three-component reaction**

To the mixture of 1.0 mmol (0.21 g) of 2-(phenylethynyl)benzaldehyde, 1.0 mmol (0.09 mL) of aniline and 1.0 mmol (0.20 g) of diphenylphosphine oxide were added in the presence of 0.05 mmol catalyst (copper(I) chloride: 0.005 g, copper(II) chloride: 0.007 g, cerium(III) chloride heptahydrate: 0.019 g, zirconium(IV) chloride: 0.012 g, bis(benzonitrile)palladium(II) chloride: 0.016 g, silver(I) acetate: 0.009 g, mercury(II) acetate: 0.016 g, copper(II) acetate monohydrate: 0.010 g, cobalt(II) acetate tetrahydrate: 0.012 g, silver trifluoromethanesulfonate: 0.013 g, zinc(II) trifluoromethanesulfonate: 0.017 g, scandium(III) trifluoromethanesulfonate: 0.025 g or yttrium(III) trifluoromethanesulfonate: 0.027 g). The reaction mixtures were stirred in 2 mL of acetonitrile in a Schlenk tube at 70 °C for 18 h on a magnetic stirrer. At given intervals, the reaction composition was analyzed by TLC and HPLC.

### **General procedure for the synthesis of (2,3-diphenyl-1,2-dihydroisoquinolin-1-yl)diphenylphosphine oxide (8)**

To the mixture of 1.0 mmol (0.21 g) of 2-(phenylethynyl)benzaldehyde, 1.0 mmol (0.09 mL) of aniline, 1.0 mmol (0.20 g) of diphenylphosphine oxide, and 0.05 mmol (0.012 g) of zirconium(IV) chloride were added 2 mL of acetonitrile. The reaction mixture was stirred in a Schlenk tube at 70–100 °C for 0.5–1 h on a magnetic stirrer. The solvent was removed in vacuum and the reaction mixtures were analysed by  $^{31}\text{P}$  NMR spectroscopy and HPLC-MS. The (2,3-diphenyl-1,2-dihydroisoquinolin-1-yl)diphenylphosphine oxide was obtained by column chromatography using silica gel as the absorbent and hexane:ethyl acetate (6:4) as the eluent.

### **General procedure for the synthesis of (3-benzyl-2-phenyl-2*H*-isoindol-1-yl)diphenylphosphine oxide (9)**

To the mixture of 1.0 mmol (0.21 g) of 2-(phenylethynyl)benzaldehyde, 1.0 mmol (0.09 mL) of aniline, 1.0 mmol (0.20 g) of diphenylphosphine oxide and 0.05 mmol (0.012 g) of 0.05 mmol (0.005 g) of silver(I) acetate were added 2 mL of acetonitrile. The reaction mixture was stirred in a Schlenk tube at 70–90 °C for 0.5–5 h on magnetic stirrer. The solvent was removed in vacuum and the reaction mixtures were analyzed by <sup>31</sup>P NMR spectroscopy and HPLC-MS. The (3-benzyl-2-phenyl-2*H*-isoindol-1-yl)diphenylphosphine oxide was obtained by column chromatography using silica gel as the absorbent and hexane:ethyl acetate (6:4) as the eluent.

### **General procedure for ring closure reactions of diphenyl((phenylamino)(2-phenylethynyl) phenyl)methylphosphine oxide (7b)**

To the reaction mixture of 1.0 mmol (0.48 g) of diphenyl((phenylamino)(2-(phenylethynyl) phenyl)methylphosphine oxide (**7b**) and 0.05 mmol of catalyst (bis(benzonitrile)palladium(II) dichloride: 0.016 g, silver trifluoromethanesulfonate: 0.013 g, silver(I) acetate: 0.009 g, copper(I) chloride: 0.005 g or copper(II) chloride: 0.007 g) were added 2 mL of acetonitrile. The reaction mixtures were stirred in a Schlenk tube at 70 °C for 40 h on magnetic stirrer. At given intervals, the reaction composition was analyzed by TLC and HPLC.

### **General procedure for ring rearrangement of (1,2-dihydroisoquinolin-1-yl)phosphine oxide (8)**

The mixture of 1.0 mmol (0.48 g) of (1,2-dihydroisoquinolin-1-yl)phosphine oxide (**8**) and 0.05 mmol of catalyst (triethylamine: 0.007 mL, silver(I) acetate: 0.009 g, copper(I) chloride: 0.005 g or copper(II) chloride: 0.007 g) were reacted in 2 mL of acetonitrile. The reaction mixtures were stirred in a Schlenk tube at 80 °C for 40 h on a magnetic stirrer. At given intervals, the reaction composition was analyzed by TLC and HPLC.

## Computational details

All DFT calculations were carried out with the Gaussian 16 suite of programs.<sup>1</sup> In our previous studies, we showed that the functional  $\omega$ B97X-D describes properly similar systems, therefore geometry optimizations were performed at the  $\omega$ B97X-D/6-311+G\*\* level of theory.<sup>2</sup> Harmonic vibrational analysis was obtained at the same level to check the nature of the stationary points obtained. Gibbs free energies (at 298 °K) were calculated using frequency calculations. In order to save computation time, butyl substituents were replaced by ethyl substituents.

**Table S1.** The relative energy of the computed transition states and intermediates starting from aniline or ethylamine

|                                                                                     | E[kcal/mol]<br>starting from aniline R=Ph | E[kcal/mol]<br>starting from ethylamine R=Et |
|-------------------------------------------------------------------------------------|-------------------------------------------|----------------------------------------------|
| 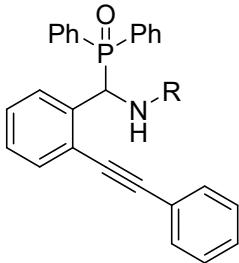   | 0.0                                       | 0.0                                          |
| TS-1                                                                                | 61.5                                      | 69.1                                         |
|    | -34.6                                     | -37.2                                        |
| TS-2                                                                                | 44.4                                      | 41.1                                         |
|   | 43.6                                      | 36.6                                         |
| TS-3                                                                                | 55.5                                      | 51.1                                         |
|  | 1.4                                       | -31.1                                        |
|  | -29.9                                     | -32.0                                        |

**((Butylamino)(2-(phenylethynyl)phenyl)methyl)diphenylphosphine oxide (7a)**

Yield: 86% (0.39 g), yellow solid; Mp: 142–143 °C;  $^{31}\text{P}$  NMR ( $\text{CDCl}_3$ )  $\delta$  31.6;  $^{13}\text{C}$  NMR ( $\text{CDCl}_3$ )  $\delta$  13.9, 20.2, 31.7, 47.4 (d,  $J_{\text{CP}} = 13.1$  Hz), 58.8 (d,  $^1J_{\text{CP}} = 80.1$  Hz), 87.8, 93.9, 123.0, 123.8 (d,  $^3J_{\text{CP}} = 6.9$  Hz), 127.4 (d,  $^3J_{\text{CP}} = 2.4$  Hz), 127.7, 127.8, 128.1 (d,  $J_{\text{CP}} = 4.0$  Hz), 128.4 (d,  $J_{\text{CP}} = 2.4$  Hz), 128.5 (d,  $J_{\text{CP}} = 4.1$  Hz), 128.6, 128.9 (d,  $J_{\text{CP}} = 2.7$  Hz), 131.3, 131.41 (d,  $J_{\text{CP}} = 4.0$ ), 131.45 (d,  $J_{\text{CP}} = 4.6$  Hz), 131.7 (d,  $^2J_{\text{CP}} = 2.6$  Hz), 131.8 (d,  $^2J_{\text{CP}} = 2.2$  Hz), 131.9 (d,  $J_{\text{CP}} = 9.2$  Hz), 132.2 (d,  $J_{\text{CP}} = 9.0$  Hz), 138.6;  $^1\text{H}$  NMR ( $\text{CDCl}_3$ )  $\delta$  0.80 (t, 3H,  $J_{\text{HH}} = 7.4$  Hz), 1.23 (p, 2H,  $J_{\text{HH}} = 7.3$  Hz), 1.42 (dt, 2H,  $J_{\text{HH}} = 7.4$  Hz,  $J_{\text{HH}} = 15.3$  Hz), 2.49 (ddd, 2H,  $J_{\text{HH}} = 6.0$  Hz,  $J_{\text{HH}} = 7.7$  Hz,  $J_{\text{HH}} = 11.7$  Hz), 2.59 (dt, 1H,  $J_{\text{HH}} = 7.2$  Hz,  $J_{\text{HH}} = 11.5$  Hz), 5.37 (d, 1H,  $^2J_{\text{HP}} = 9.4$  Hz), 7.18 (q, 2H,  $J_{\text{HH}} = 7.2$  Hz), 7.31 (dd, 2H,  $J_{\text{HH}} = 6.7$  Hz,  $J_{\text{HH}} = 14.0$  Hz), 7.35 (d, 2H,  $J_{\text{HH}} = 5.8$  Hz), 7.38–7.41 (m, 2H), 7.47 (dd, 2H,  $J_{\text{HH}} = 2.2$  Hz,  $J_{\text{HH}} = 4.8$  Hz), 7.50 (d, 2H,  $J_{\text{HH}} = 4.5$  Hz), 7.52–7.59 (m, 2H), 7.73 (dt, 4H,  $J_{\text{HH}} = 7.7$  Hz,  $J_{\text{HH}} = 10.1$  Hz), 7.97 (s, 1H);  $[\text{M}+\text{H}]^+_{\text{found}} = 464.2065$ ;  $\text{C}_{31}\text{H}_{31}\text{NOP}$  requires 464.2069.

**Diphenyl((phenylamino)(2-(phenylethynyl)phenyl)methyl)phosphine oxide (7b)**

Yield: 96% (0.46 g), white solid; Mp: 175–176 °C;  $^{31}\text{P}$  NMR ( $\text{CDCl}_3$ )  $\delta$  33.6;  $^{13}\text{C}$  NMR ( $\text{CDCl}_3$ )  $\delta$  53.8 (d,  $^1J_{\text{CP}} = 74.9$  Hz), 87.6 (d,  $J_{\text{CP}} = 1.7$  Hz), 94.9, 113.6, 118.1, 122.9, 123.1 (d,  $^3J_{\text{CP}} = 5.5$  Hz), 127.6 (d,  $^3J_{\text{CP}} = 4.2$  Hz), 127.6 (d,  $^3J_{\text{CP}} = 12.2$  Hz), 128.0 (d,  $J_{\text{CP}} = 3.9$  Hz), 128.67, 128.69, 128.9 (d,  $^3J_{\text{CP}} = 11.8$  Hz), 129.1 (d,  $J_{\text{CP}} = 2.8$  Hz), 129.3, 129.7 (d,  $^1J_{\text{CP}} = 100.4$  Hz), 130.9 (d,  $^1J_{\text{CP}} = 97.0$  Hz), 131.3, 131.5 (d,  $^2J_{\text{CP}} = 8.7$  Hz), 131.5 (d,  $^3J_{\text{CP}} = 1.8$  Hz), 131.8, (d,  $^2J_{\text{CP}} = 9.6$  Hz) 131.9 (d,  $J_{\text{CP}} = 3.1$  Hz), 132.3 (d,  $J_{\text{CP}} = 2.8$  Hz) 137.9 (d,  $J_{\text{CP}} = 1.2$  Hz), 146.1 (d,  $^2J_{\text{CP}} = 11.1$  Hz);  $^1\text{H}$  NMR ( $\text{CDCl}_3$ )  $\delta$  5.51 (t, 1H,  $^2J_{\text{HP}} = 8.9$  Hz), 6.05 (dd, 1H,  $J_{\text{HH}} = 9.2$  Hz,  $J_{\text{HH}} = 10.9$  Hz), 6.65 (t, 1H,  $J_{\text{HH}} = 7.3$  Hz), 6.71 (d, 2H,  $J_{\text{HH}} = 7.8$  Hz), 7.05–7.17 (m, 5H), 7.19 (d, 1H,  $J_{\text{HH}} = 7.6$  Hz), 7.28–7.36 (m, 4H), 7.37–7.42 (m, 3H), 7.43–7.50 (m, 4H), 7.54 (ddd, 1H,  $J_{\text{HH}} = 1.5$  Hz,  $J_{\text{HH}} = 5.2$  Hz,  $J_{\text{HH}} = 7.5$  Hz), 7.75 (dt, 1H,  $J_{\text{HH}} = 1.7$  Hz,  $J_{\text{HH}} = 7.9$  Hz), 7.97 (ddd, 2H,  $J_{\text{HH}} = 1.5$  Hz,  $J_{\text{HH}} = 6.8$  Hz,  $J_{\text{HH}} = 11.2$  Hz);  $[\text{M}+\text{H}]^+_{\text{found}} = 484.1838$ ;  $\text{C}_{33}\text{H}_{27}\text{NOP}$  requires 484.1752.



**(2,3-Diphenyl-1,2-dihydroisoquinolin-1-yl)diphenylphosphine oxide (8)**

Yield: 91% (0.44 g), white solid; Mp: 235–236 °C;  $^{31}\text{P}$  NMR ( $\text{CDCl}_3$ )  $\delta$  24.7;  $^{13}\text{C}$  NMR ( $\text{CDCl}_3$ )  $\delta$  69.5 (d,  $J_{\text{CP}} = 78.6$  Hz), 112.3, 122.8, 123.5 (d,  $J_{\text{CP}} = 1.5$  Hz), 124.7 (d,  $J_{\text{CP}} = 2.3$  Hz), 125.2 (d,  $J_{\text{CP}} = 6.1$ ), 126.1 (d,  $J_{\text{CP}} = 2.2$  Hz), 127.1 (d,  $J_{\text{CP}} = 4.3$  Hz), 127.5 (d,  $J_{\text{CP}} = 11.2$  Hz), 127.88, 127.9, 128.0, 128.3 (d,  $J_{\text{CP}} = 2.9$  Hz), 128.5 (d,  $J_{\text{CP}} = 11.1$  Hz), 128.6, 129.1, 131.5, 131.8 (d,  $J_{\text{CP}} = 2.9$  Hz), 131.9 (d,  $J_{\text{CP}} = 8.7$  Hz), 132.0 (d,  $J_{\text{CP}} = 2.9$  Hz), 132.2, 132.8 (d,  $J_{\text{CP}} = 8.6$  Hz), 134.4 (d,  $J_{\text{CP}} = 2.9$  Hz), 137.1, 142.6, 148.2 (d,  $J_{\text{CP}} = 4.8$  Hz);  $^1\text{H}$  NMR ( $\text{CDCl}_3$ )  $\delta$  5.87 (s, 1H), 5.98 (d, 1H,  $J_{\text{HP}} = 13.5$  Hz), 6.55 (d, 1H,  $J_{\text{HH}} = 7.5$  Hz), 6.91 (t, 1H,  $J_{\text{HH}} = 7.3$  Hz), 6.97 (t, 1H,  $J_{\text{HH}} = 7.5$  Hz), 7.05 (d, 1H,  $J_{\text{HH}} = 7.6$  Hz), 7.13 (d, 2H,  $J_{\text{HH}} = 7.8$  Hz), 7.19 (dq, 5H,  $J_{\text{HH}} = 2.9$  Hz  $J_{\text{HH}} = 6.9$  Hz), 7.24 (t, 3H,  $J_{\text{HH}} = 7.3$  Hz), 7.38 (dt, 1H,  $J_{\text{HH}} = 4.4$  Hz,  $J_{\text{HH}} = 7.6$  Hz), 7.45–7.52 (m, 2H), 7.54 (d, 2H,  $J_{\text{HH}} = 6.9$  Hz), 7.58 (t, 1H,  $J_{\text{HH}} = 7.0$  Hz), 7.88–7.93 (m, 2H);  $[\text{M}+\text{H}]^+_{\text{found}} = 484.1795$ ;  $\text{C}_{33}\text{H}_{26}\text{NOP}$  requires 484.1752.

**(3-Benzyl-2-phenyl-2H-isoindol-1-yl)diphenylphosphine oxide (9)**

Yield: 93% (0.44 g), white solid; Mp: 235–236 °C;  $^{31}\text{P}$  NMR ( $\text{CDCl}_3$ )  $\delta$  13.9;  $^{13}\text{C}$  NMR ( $\text{CDCl}_3$ )  $\delta$  21.2, 118.9, 120.2, 121.1, 124.0, 126.2 (d,  $J_{\text{CP}} = 11.2$  Hz), 126.5, 126.8, 127.6, 128.1, 128.3, 128.7 (d,  $J_{\text{CP}} = 11.6$  Hz), 129.1, 129.6 0 (d,  $J_{\text{CP}} = 9.0$  Hz), 130.0 (d,  $J_{\text{CP}} = 8.6$  Hz), 130.4, 131.0, 131.6, 132.2, 132.8, 133.0, 133.2, 133.4, 134.1, 136.6, 137.2, 137.6, 137.7, 137.8, 138.7;  $^1\text{H}$  NMR ( $\text{CDCl}_3$ )  $\delta$  4.11 (s, 1H), 6.79–6.83 (m, 1H), 6.84–6.87 (m, 1H), 6.90 (ddd, 1H,  $J_{\text{HH}} = 1.1$  Hz,  $J_{\text{HH}} = 6.6$  Hz,  $J_{\text{HH}} = 8.8$  Hz), 6.96 (s, 1H), 7.00 (d, 2H,  $J_{\text{HH}} = 7.5$  Hz), 7.06 (s, 1H), 7.13 (dd, 2H,  $J_{\text{HH}} = 1.9$  Hz,  $J_{\text{HH}} = 5.1$  Hz), 7.22 (d, 2H,  $J_{\text{HH}} = 1.7$  Hz), 7.23–7.25 (m, 2H), 7.29 (t, 2H,  $J_{\text{HH}} = 7.4$  Hz), 7.49 (dd, 2H,  $J_{\text{HH}} = 7.2$  Hz,  $J_{\text{HH}} = 8.5$  Hz), 7.54–7.58 (m, 3H), 7.60–7.64 (m, 1H), 7.68 (d, 2H,  $J_{\text{HH}} = 6.8$  Hz);  $[\text{M}+\text{H}]^+_{\text{found}} = 484.1867$ ;  $\text{C}_{33}\text{H}_{27}\text{NOP}$  requires 484.1752.

# $^{31}\text{P}$ NMR, $^{13}\text{C}$ NMR and $^1\text{H}$ NMR spectra

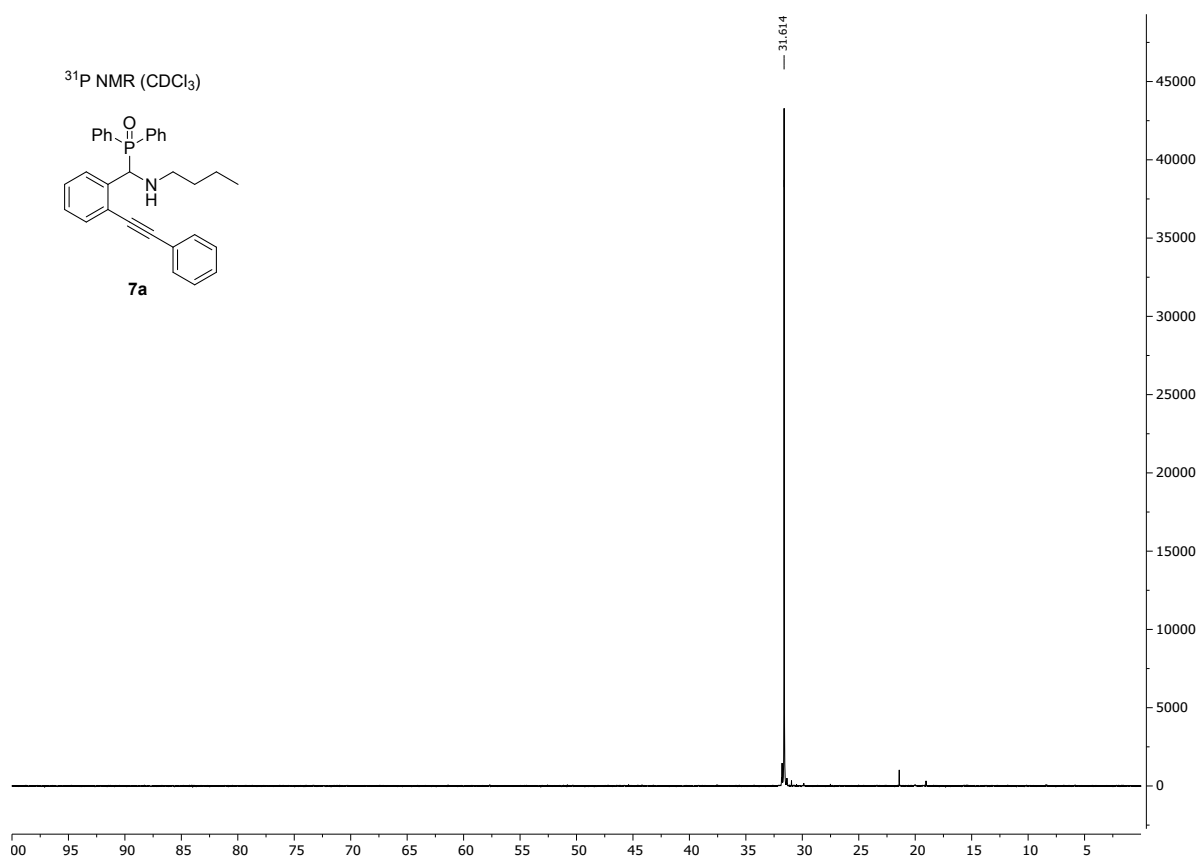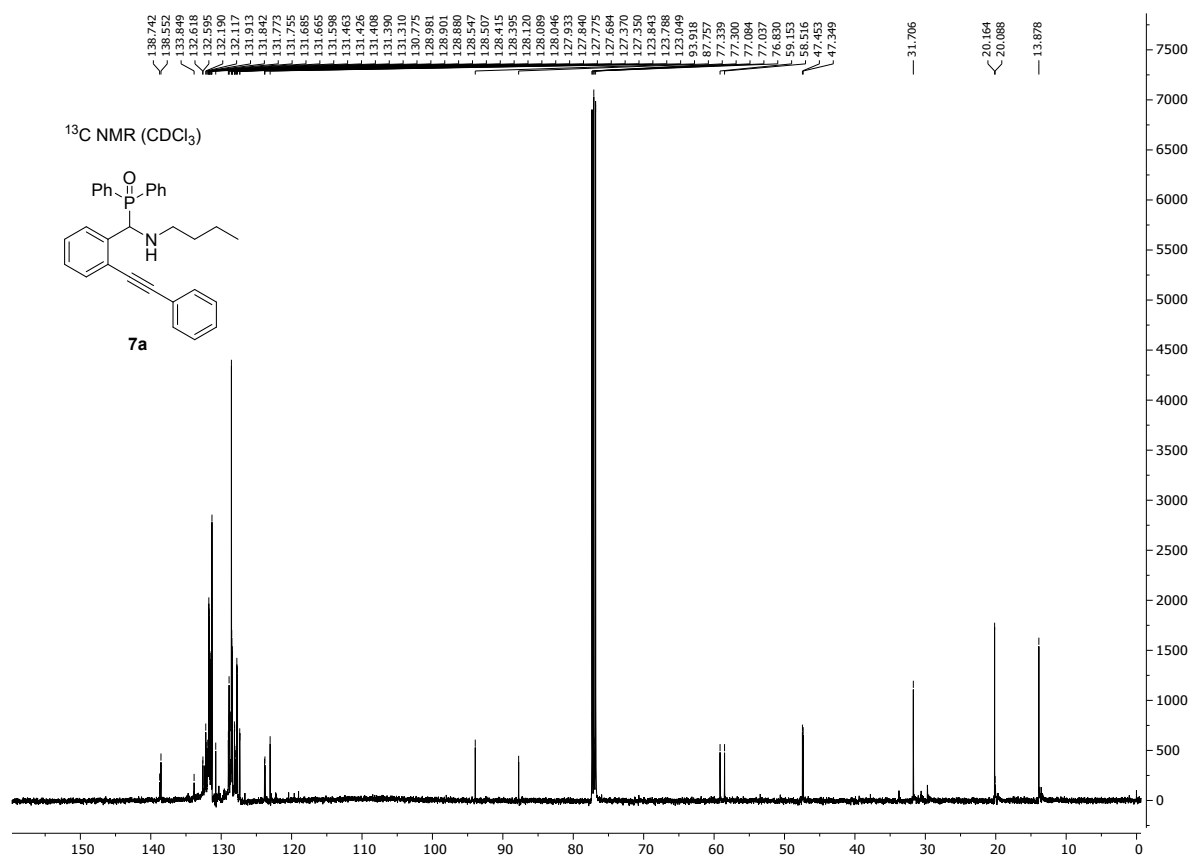







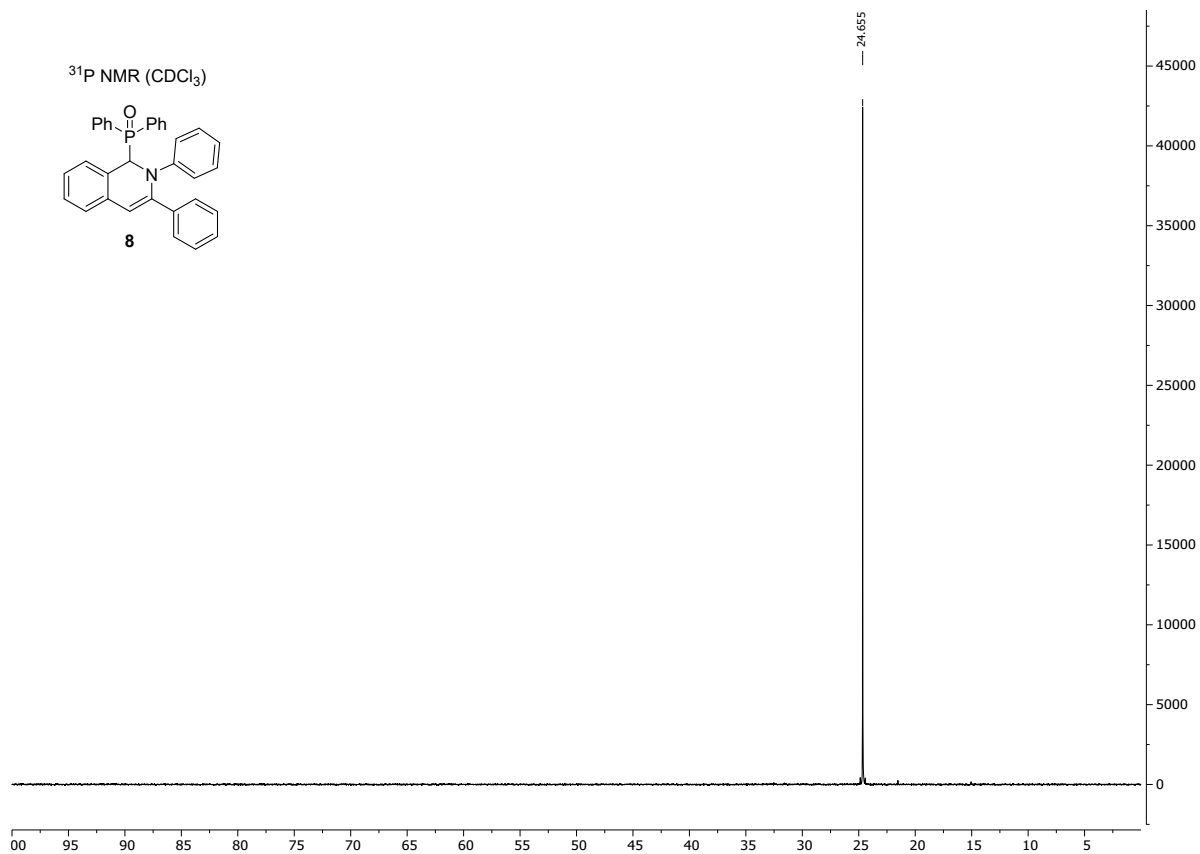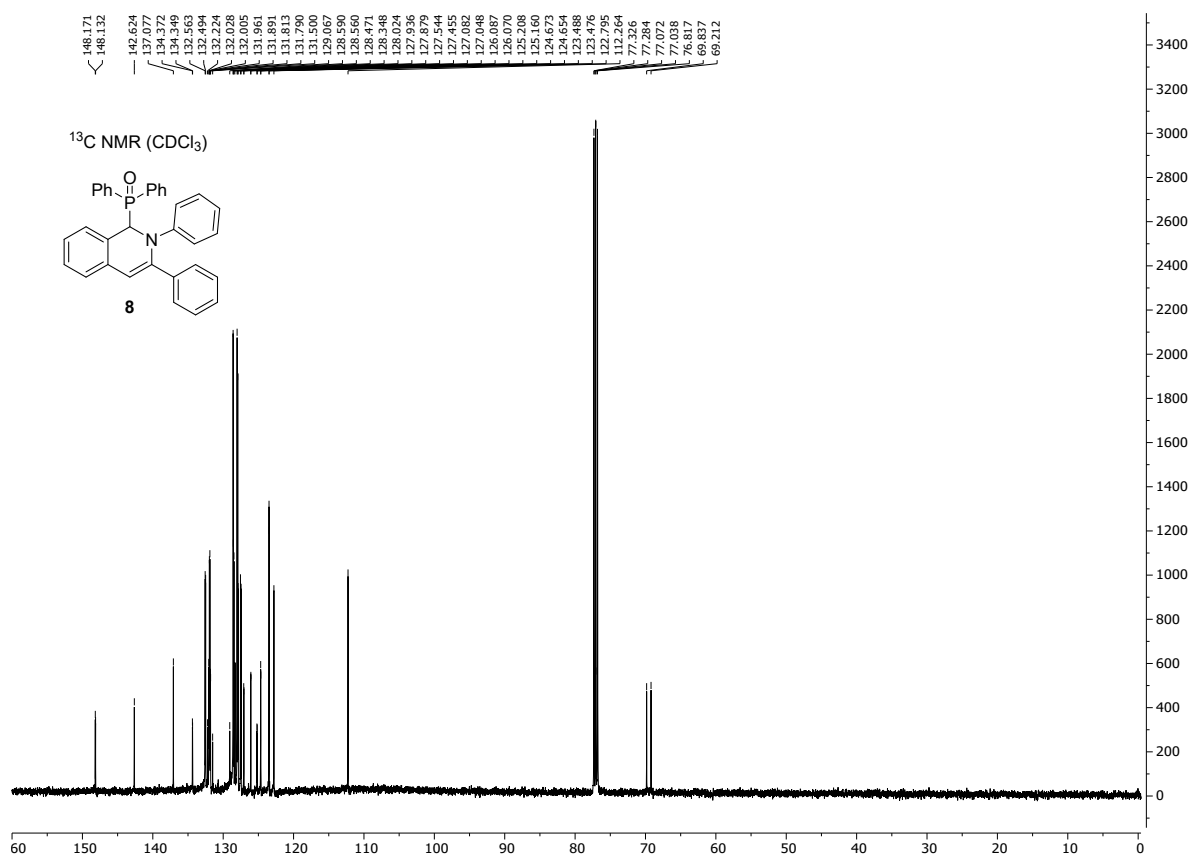



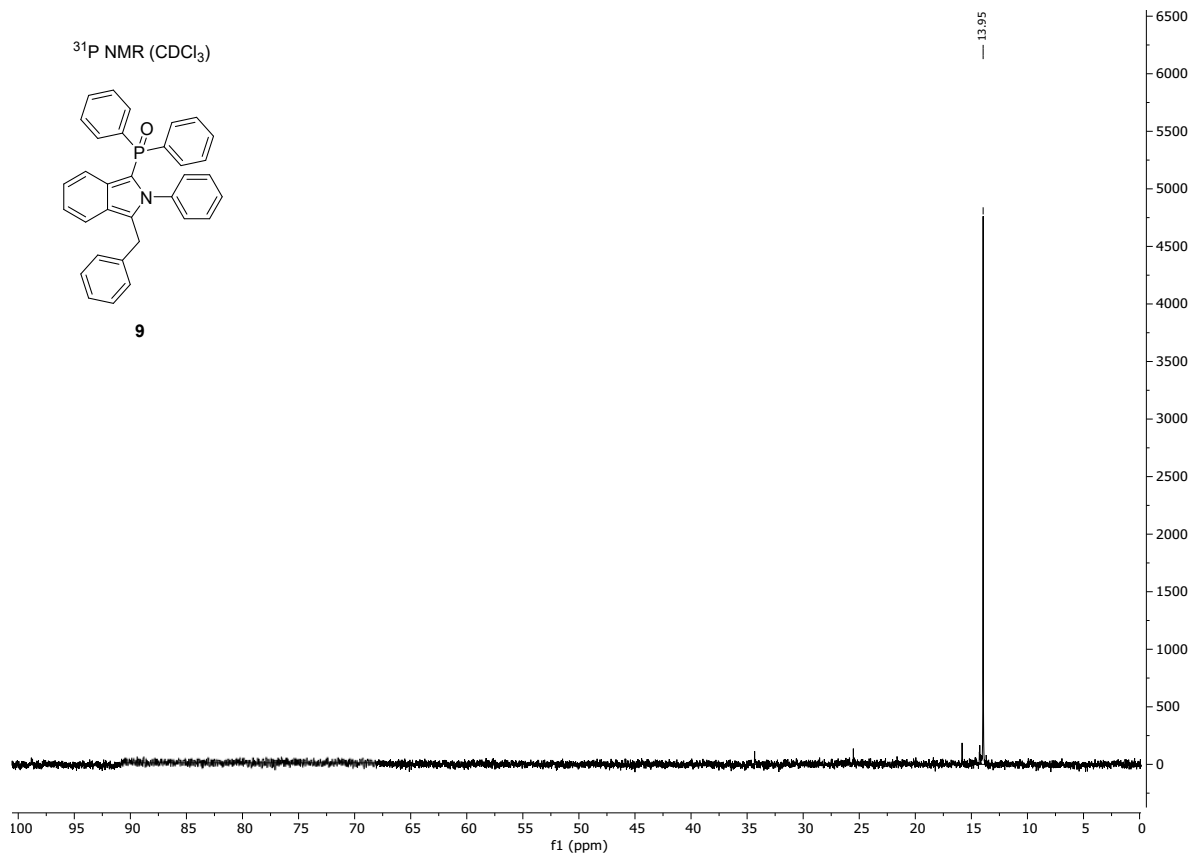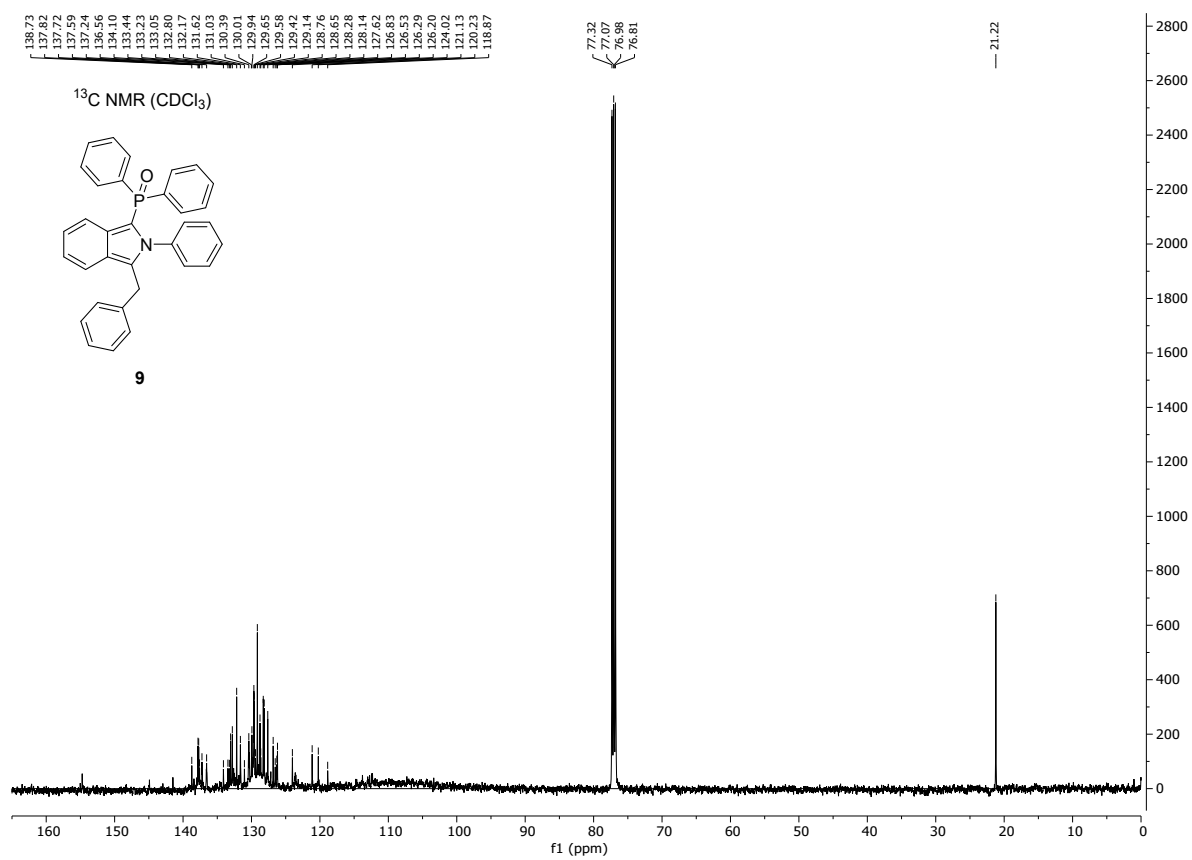



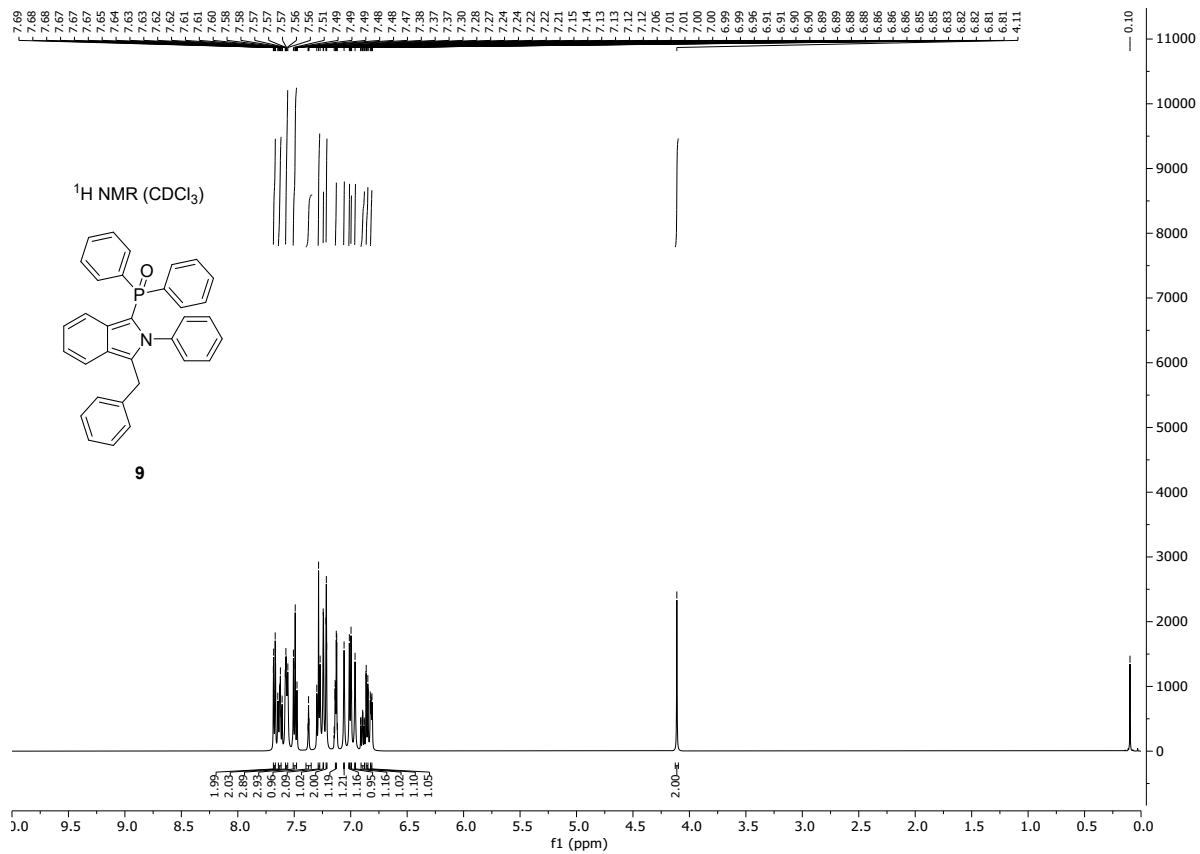

## XYZ coordinates and total energies of the investigated systems

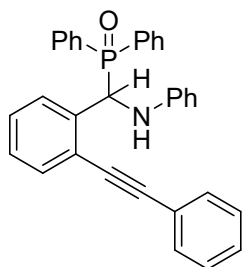

62

$E(\omega\text{B97X-D/6-311+G}^{**}) = -1744.350029$

|   |           |           |           |
|---|-----------|-----------|-----------|
| C | -3.462165 | -1.591065 | -0.863260 |
| C | -2.161892 | -2.104456 | -0.829499 |
| C | -1.975780 | -3.465902 | -0.588578 |
| C | -3.067437 | -4.293490 | -0.352523 |
| C | -4.353622 | -3.770567 | -0.362926 |
| C | -4.549467 | -2.418526 | -0.623912 |
| P | -0.767883 | -1.020542 | -1.276557 |
| C | -0.880671 | 0.569363  | -0.296964 |
| N | -1.939595 | 1.343746  | -0.918942 |
| C | -2.006063 | 2.732311  | -0.712283 |
| C | -1.261913 | 3.400950  | 0.261497  |
| C | -1.403872 | 4.775915  | 0.426195  |
| C | -2.272559 | 5.506024  | -0.370727 |
| C | -3.009835 | 4.841300  | -1.348096 |
| C | -2.884143 | 3.473143  | -1.514714 |
| C | 0.751512  | -1.814174 | -0.690057 |
| C | 1.863769  | -1.730804 | -1.526474 |
| C | 3.090588  | -2.225206 | -1.101996 |
| C | 3.206141  | -2.809800 | 0.152518  |
| C | 2.095402  | -2.906367 | 0.984768  |
| C | 0.869438  | -2.408778 | 0.568081  |
| O | -0.745304 | -0.653192 | -2.728842 |
| C | -1.043361 | 0.384551  | 1.195184  |
| C | 0.079254  | 0.405969  | 2.046368  |

|   |           |           |           |
|---|-----------|-----------|-----------|
| C | -0.088467 | 0.210429  | 3.422431  |
| C | -1.349636 | 0.007271  | 3.957179  |
| C | -2.461173 | 0.012679  | 3.121505  |
| C | -2.303792 | 0.204212  | 1.756836  |
| C | 1.388344  | 0.629043  | 1.521981  |
| C | 2.478446  | 0.769860  | 1.028407  |
| C | 3.741222  | 0.855159  | 0.369663  |
| C | 4.910038  | 0.425622  | 1.006340  |
| C | 6.120466  | 0.446332  | 0.328742  |
| C | 6.179573  | 0.896524  | -0.986237 |
| C | 5.021459  | 1.333066  | -1.621586 |
| C | 3.807901  | 1.314894  | -0.950456 |
| H | -3.170709 | 0.233445  | 1.110069  |
| H | -3.453959 | -0.126857 | 3.533569  |
| H | -1.467022 | -0.140431 | 5.024533  |
| H | 0.785695  | 0.229426  | 4.062432  |
| H | 4.856004  | 0.066149  | 2.027193  |
| H | 7.021640  | 0.108772  | 0.828154  |
| H | 7.126633  | 0.910387  | -1.513668 |
| H | 5.063154  | 1.687553  | -2.645199 |
| H | 2.901169  | 1.644029  | -1.444634 |
| H | -0.978859 | -3.890142 | -0.590801 |
| H | -2.909818 | -5.349504 | -0.165155 |
| H | -5.204324 | -4.416734 | -0.177308 |
| H | -5.552578 | -2.007985 | -0.646098 |
| H | -3.622331 | -0.539623 | -1.071980 |
| H | 0.012677  | -2.465906 | 1.230495  |
| H | 2.186762  | -3.359792 | 1.965159  |
| H | 4.166600  | -3.186506 | 0.486232  |
| H | 3.958942  | -2.139253 | -1.744967 |
| H | 1.756842  | -1.269911 | -2.502538 |
| H | -3.468826 | 2.960198  | -2.272081 |
| H | -3.692082 | 5.394057  | -1.984725 |
| H | -2.375095 | 6.576426  | -0.237423 |

|   |           |          |           |
|---|-----------|----------|-----------|
| H | -0.817267 | 5.275811 | 1.189272  |
| H | -0.570019 | 2.864524 | 0.897126  |
| H | -2.007329 | 1.115969 | -1.905610 |
| H | 0.105703  | 1.020451 | -0.484797 |

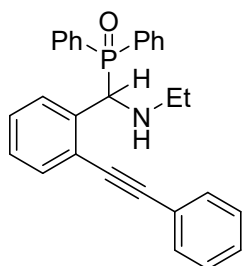

58

$E(\omega\text{B97X-D/6-311+G}^{**}) = -1591.943768$

|   |           |           |           |
|---|-----------|-----------|-----------|
| C | 3.901270  | 0.327010  | -1.311205 |
| C | 3.745233  | 0.609749  | 0.050802  |
| C | 4.810641  | 0.373513  | 0.925555  |
| C | 6.005738  | -0.142686 | 0.445435  |
| C | 6.153004  | -0.426721 | -0.908321 |
| C | 5.098710  | -0.188294 | -1.784309 |
| C | 2.489020  | 1.078151  | 0.538890  |
| C | 1.391492  | 1.395706  | 0.921636  |
| C | 0.063892  | 1.679610  | 1.364198  |
| C | -1.037874 | 1.501693  | 0.505115  |
| C | -2.313178 | 1.778911  | 0.990571  |
| C | -2.509030 | 2.207147  | 2.294808  |
| C | -1.419918 | 2.375418  | 3.144053  |
| C | -0.141798 | 2.116884  | 2.678710  |
| C | -0.839927 | 1.020572  | -0.913619 |
| N | -1.680758 | 1.690944  | -1.901183 |
| C | -1.169479 | 2.993937  | -2.338307 |
| P | -1.061617 | -0.817955 | -1.148554 |
| O | -0.844087 | -1.128292 | -2.598247 |
| C | -2.704366 | -1.313512 | -0.536755 |
| C | -3.831900 | -0.587138 | -0.931750 |

|   |           |           |           |
|---|-----------|-----------|-----------|
| C | -5.100860 | -1.008353 | -0.560566 |
| C | -5.259884 | -2.163859 | 0.197004  |
| C | -4.145974 | -2.901729 | 0.575689  |
| C | -2.873250 | -2.481266 | 0.207701  |
| C | 0.168669  | -1.569212 | -0.048068 |
| C | 1.318565  | -2.079926 | -0.647621 |
| C | 2.356437  | -2.564397 | 0.138618  |
| C | 2.244145  | -2.546053 | 1.522763  |
| C | 1.091016  | -2.051943 | 2.124793  |
| C | 0.053926  | -1.563265 | 1.343852  |
| H | -3.156157 | 1.674076  | 0.320607  |
| H | -3.512785 | 2.414694  | 2.647911  |
| H | -1.566393 | 2.713644  | 4.163439  |
| H | 0.717827  | 2.250281  | 3.324814  |
| H | 4.687566  | 0.588135  | 1.980568  |
| H | 6.825688  | -0.325395 | 1.130835  |
| H | 7.087631  | -0.831036 | -1.280180 |
| H | 5.208676  | -0.407507 | -2.840310 |
| H | 3.072230  | 0.501144  | -1.987366 |
| H | -2.012677 | -3.071244 | 0.500733  |
| H | -4.265015 | -3.809819 | 1.155723  |
| H | -6.252348 | -2.492185 | 0.485232  |
| H | -5.968538 | -0.434897 | -0.866802 |
| H | -3.710970 | 0.314702  | -1.521622 |
| H | -0.834220 | -1.161091 | 1.819093  |
| H | 1.003882  | -2.037234 | 3.205255  |
| H | 3.059074  | -2.914528 | 2.135956  |
| H | 3.258976  | -2.939561 | -0.330146 |
| H | 1.391702  | -2.082545 | -1.729880 |
| H | -1.711261 | 1.088203  | -2.719169 |
| H | 0.227761  | 1.133981  | -1.165063 |
| H | -1.704171 | 3.242631  | -3.259519 |
| C | -1.378934 | 4.113757  | -1.327161 |
| H | -0.098534 | 2.930536  | -2.594966 |

|   |           |          |           |
|---|-----------|----------|-----------|
| H | -1.095349 | 5.070677 | -1.773752 |
| H | -2.427740 | 4.167074 | -1.025172 |
| H | -0.774896 | 3.974097 | -0.428714 |

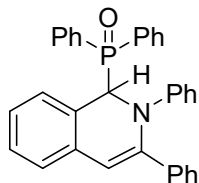

62

$E(\omega\text{B97X-D/6-311+G}^{**}) = -1744.397678$

|   |           |           |           |
|---|-----------|-----------|-----------|
| N | 0.704166  | 0.610158  | -0.462410 |
| C | 1.460072  | 1.101860  | 0.620169  |
| C | 2.784568  | 0.477943  | 0.845382  |
| C | -0.741048 | 0.734326  | -0.335001 |
| P | -1.483000 | -0.508137 | 0.873083  |
| C | -0.413254 | -1.978950 | 0.808965  |
| C | 1.265232  | 0.613879  | -1.763339 |
| C | -1.146973 | 2.110077  | 0.119225  |
| C | -0.310337 | 2.722158  | 1.060523  |
| C | -0.685437 | 3.956157  | 1.592680  |
| C | -1.863231 | 4.567743  | 1.186776  |
| C | -2.680751 | 3.957866  | 0.240256  |
| C | -2.319814 | 2.726405  | -0.293733 |
| O | -1.652410 | -0.014306 | 2.271531  |
| C | -3.085187 | -0.924937 | 0.106704  |
| H | -0.046270 | 4.437419  | 2.325724  |
| H | -2.146289 | 5.525245  | 1.609425  |
| H | -3.601841 | 4.435491  | -0.073292 |
| H | -2.962180 | 2.233753  | -1.017248 |
| C | -0.287323 | -2.813478 | -0.300620 |
| C | 0.594531  | -3.885817 | -0.271047 |
| C | 1.345167  | -4.137358 | 0.873282  |
| C | 1.209529  | -3.318704 | 1.987213  |
| C | 0.334768  | -2.239752 | 1.956226  |

|   |           |           |           |
|---|-----------|-----------|-----------|
| H | -0.886861 | -2.647737 | -1.188301 |
| H | 0.690382  | -4.529676 | -1.137966 |
| H | 2.032002  | -4.976209 | 0.895723  |
| H | 1.792926  | -3.512342 | 2.879881  |
| H | 0.222076  | -1.587186 | 2.814693  |
| C | -4.186999 | -0.956138 | 0.960668  |
| C | -5.448754 | -1.257260 | 0.462297  |
| C | -5.618811 | -1.524022 | -0.890847 |
| C | -4.525889 | -1.485186 | -1.750259 |
| C | -3.264468 | -1.183466 | -1.253961 |
| H | -4.039173 | -0.729719 | 2.010961  |
| H | -6.301239 | -1.277821 | 1.131662  |
| H | -6.604088 | -1.756298 | -1.279346 |
| H | -4.657046 | -1.683939 | -2.807877 |
| H | -2.427930 | -1.144075 | -1.944520 |
| C | 2.298254  | 1.489871  | -2.098137 |
| C | 2.855358  | 1.461579  | -3.369393 |
| C | 2.379688  | 0.579415  | -4.331679 |
| C | 1.342327  | -0.286516 | -4.004981 |
| C | 0.796130  | -0.278443 | -2.729686 |
| H | 2.660056  | 2.196033  | -1.360605 |
| H | 3.659776  | 2.147163  | -3.611292 |
| H | 2.812500  | 0.565507  | -5.325034 |
| H | 0.966064  | -0.987306 | -4.742105 |
| H | 0.019276  | -0.988516 | -2.473011 |
| C | 3.810801  | 1.185435  | 1.476945  |
| C | 5.041648  | 0.589556  | 1.712786  |
| C | 5.273284  | -0.720093 | 1.305860  |
| C | 4.264952  | -1.425013 | 0.659353  |
| C | 3.032428  | -0.831573 | 0.427737  |
| H | 3.650437  | 2.217702  | 1.767813  |
| H | 5.826808  | 1.153694  | 2.203732  |
| H | 6.237140  | -1.183749 | 1.483867  |
| H | 4.434574  | -2.445485 | 0.334206  |

|   |           |           |           |
|---|-----------|-----------|-----------|
| H | 2.250621  | -1.389394 | -0.072741 |
| C | 0.937130  | 2.058217  | 1.412005  |
| H | 1.449863  | 2.353551  | 2.318585  |
| H | -1.182026 | 0.524594  | -1.308777 |

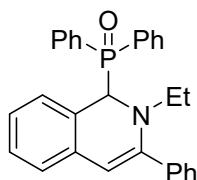

58

E( $\omega$ B97X-D/6-311+G\*\*)=-1591.994744

|   |           |           |           |
|---|-----------|-----------|-----------|
| C | -1.029429 | 2.356771  | -0.648478 |
| C | -1.593833 | 1.365545  | 0.066362  |
| N | -0.827980 | 0.622682  | 0.991807  |
| C | 0.599484  | 0.611403  | 0.721495  |
| C | 1.156656  | 1.972497  | 0.401325  |
| C | 0.327617  | 2.805485  | -0.361897 |
| C | 0.817083  | 4.044802  | -0.775701 |
| C | 2.099261  | 4.447091  | -0.426989 |
| C | 2.909173  | 3.620176  | 0.345068  |
| C | 2.433986  | 2.380937  | 0.759674  |
| C | -1.203414 | 0.809677  | 2.398961  |
| C | -3.008328 | 0.951103  | -0.070880 |
| C | -4.003039 | 1.868541  | -0.419137 |
| C | -5.320072 | 1.458893  | -0.575706 |
| C | -5.667620 | 0.127441  | -0.372508 |
| C | -4.688088 | -0.789554 | -0.008273 |
| C | -3.370196 | -0.381890 | 0.144780  |
| P | 1.025730  | -0.536919 | -0.702143 |
| C | 2.737177  | -1.037656 | -0.313922 |
| C | 3.676864  | -0.857511 | -1.327323 |
| C | 5.011251  | -1.179334 | -1.107818 |
| C | 5.414250  | -1.679833 | 0.123865  |
| C | 4.481845  | -1.857935 | 1.141123  |



|   |           |           |           |
|---|-----------|-----------|-----------|
| C | 3.149170  | -1.535328 | 0.923739  |
| C | -0.077988 | -1.970475 | -0.509672 |
| C | -0.206499 | -2.705677 | 0.668091  |
| C | -1.132980 | -3.735667 | 0.750801  |
| C | -1.936519 | -4.038179 | -0.345248 |
| C | -1.808629 | -3.311417 | -1.521778 |
| C | -0.882931 | -2.277298 | -1.604702 |
| O | 0.932318  | 0.047461  | -2.072710 |
| H | 0.185045  | 4.695878  | -1.370834 |
| H | 2.469641  | 5.410965  | -0.757914 |
| H | 3.911371  | 3.934219  | 0.613271  |
| H | 3.067859  | 1.719094  | 1.342118  |
| H | 0.399844  | -2.472303 | 1.535128  |
| H | -1.232065 | -4.300548 | 1.671014  |
| H | -2.662089 | -4.841357 | -0.278289 |
| H | -2.436367 | -3.541286 | -2.375052 |
| H | -0.782689 | -1.686358 | -2.508240 |
| H | 3.345737  | -0.454624 | -2.278173 |
| H | 5.737308  | -1.034463 | -1.899737 |
| H | 6.455553  | -1.929088 | 0.295123  |
| H | 4.794072  | -2.245773 | 2.104195  |
| H | 2.438907  | -1.674477 | 1.732090  |
| H | -3.744277 | 2.913533  | -0.549435 |
| H | -6.080278 | 2.183719  | -0.845084 |
| H | -6.697345 | -0.190851 | -0.491236 |
| H | -4.947634 | -1.830362 | 0.151729  |
| H | -2.604012 | -1.097250 | 0.418521  |
| H | -1.585145 | 2.845433  | -1.439245 |
| H | 1.106566  | 0.193149  | 1.593681  |
| C | -0.969607 | -0.427978 | 3.252128  |
| H | -0.671433 | 1.675890  | 2.819572  |
| H | -2.266394 | 1.057067  | 2.415050  |
| H | -1.287204 | -0.237137 | 4.280414  |
| H | -1.538314 | -1.274043 | 2.860587  |

H 0.086865 -0.711495 3.287639

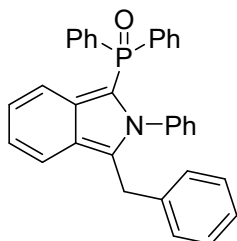

62

E( $\omega$ B97X-D/6-311+G\*\*) = -1744.405116

|   |           |           |           |
|---|-----------|-----------|-----------|
| N | 0.512967  | 0.269508  | -0.987627 |
| C | 1.758341  | 0.604899  | -1.428297 |
| C | 2.768983  | -0.416983 | -1.835001 |
| C | -0.199633 | 1.391384  | -0.595897 |
| P | -1.738419 | 1.442637  | 0.324635  |
| C | -1.321027 | 0.842216  | 1.995593  |
| C | 0.010363  | -1.072671 | -1.035863 |
| C | 0.651268  | 2.486220  | -0.782204 |
| C | 1.884274  | 1.985763  | -1.309921 |
| C | 2.959505  | 2.871111  | -1.589771 |
| C | 2.787194  | 4.200818  | -1.339862 |
| C | 1.557900  | 4.700660  | -0.811026 |
| C | 0.503994  | 3.879543  | -0.532652 |
| O | -2.329472 | 2.814729  | 0.311190  |
| C | -2.870441 | 0.202154  | -0.383601 |
| H | 3.895086  | 2.495703  | -1.991301 |
| H | 3.592145  | 4.897875  | -1.544831 |
| H | 1.465380  | 5.765936  | -0.629885 |
| H | -0.431620 | 4.255317  | -0.137596 |
| C | -2.347457 | 0.668184  | 2.927258  |
| C | -2.056641 | 0.255000  | 4.219712  |
| C | -0.737248 | 0.019147  | 4.595204  |
| C | 0.289885  | 0.208112  | 3.679338  |
| C | -0.000630 | 0.622571  | 2.384409  |
| H | -3.375981 | 0.860346  | 2.639388  |

|   |           |           |           |
|---|-----------|-----------|-----------|
| H | -2.858466 | 0.120450  | 4.936886  |
| H | -0.511238 | -0.303811 | 5.605415  |
| H | 1.320122  | 0.037104  | 3.970989  |
| H | 0.806237  | 0.781295  | 1.676774  |
| C | -3.108734 | -1.051835 | 0.174490  |
| C | -3.988376 | -1.933577 | -0.441703 |
| C | -4.631204 | -1.569095 | -1.617814 |
| C | -4.401151 | -0.315710 | -2.176748 |
| C | -3.528896 | 0.569567  | -1.559227 |
| H | -2.597006 | -1.352455 | 1.080924  |
| H | -4.163948 | -2.909948 | -0.004452 |
| H | -5.315785 | -2.259563 | -2.098290 |
| H | -4.909358 | -0.024906 | -3.089314 |
| H | -3.360785 | 1.555967  | -1.978660 |
| C | -0.666433 | -1.492367 | -2.174709 |
| C | -1.138189 | -2.794537 | -2.246919 |
| C | -0.927257 | -3.670474 | -1.186632 |
| C | -0.246595 | -3.242825 | -0.054107 |
| C | 0.227237  | -1.938906 | 0.025560  |
| H | -0.831441 | -0.789176 | -2.982466 |
| H | -1.679769 | -3.121813 | -3.126483 |
| H | -1.297982 | -4.687684 | -1.244081 |
| H | -0.075833 | -3.923873 | 0.771370  |
| H | 0.771992  | -1.598905 | 0.897119  |
| H | 3.589239  | 0.103681  | -2.337887 |
| C | 3.310147  | -1.207397 | -0.655325 |
| H | 2.344352  | -1.109705 | -2.567842 |
| C | 3.463724  | -2.588173 | -0.737461 |
| C | 3.917194  | -3.319017 | 0.354911  |
| C | 4.223750  | -2.673701 | 1.546575  |
| C | 4.081613  | -1.292421 | 1.634891  |
| C | 3.628453  | -0.565586 | 0.541509  |
| H | 3.200802  | -3.101458 | -1.657164 |
| H | 4.021227  | -4.395628 | 0.276839  |

|   |          |           |          |
|---|----------|-----------|----------|
| H | 4.571638 | -3.242321 | 2.401640 |
| H | 4.324238 | -0.779129 | 2.559053 |
| H | 3.504574 | 0.510316  | 0.619923 |

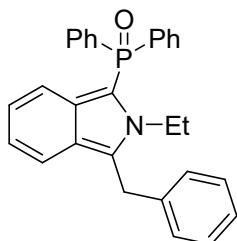

58

$E(\omega B97X-D/6-311+G^{**}) = -1592.002992$

|   |           |           |           |
|---|-----------|-----------|-----------|
| C | -2.494976 | 1.870715  | 2.175592  |
| C | -1.456993 | 1.141194  | 1.589360  |
| C | -0.157012 | 1.642750  | 1.635203  |
| C | 0.099804  | 2.869588  | 2.237299  |
| C | -0.938707 | 3.596114  | 2.805474  |
| C | -2.236477 | 3.093108  | 2.779136  |
| P | -1.857300 | -0.478743 | 0.852780  |
| C | -0.323021 | -1.141002 | 0.205072  |
| N | 0.499960  | -0.583524 | -0.757544 |
| C | 1.665088  | -1.276596 | -0.860393 |
| C | 1.621256  | -2.319841 | 0.061718  |
| C | 0.365376  | -2.236756 | 0.741867  |
| C | 0.056165  | -3.173915 | 1.766579  |
| C | 0.981715  | -4.130889 | 2.069405  |
| C | 2.236206  | -4.210161 | 1.392969  |
| C | 2.561988  | -3.325864 | 0.406308  |
| C | 0.161178  | 0.538380  | -1.630409 |
| C | 2.807383  | -0.821603 | -1.708830 |
| C | 3.459207  | 0.452245  | -1.191880 |
| C | 3.948624  | 1.407837  | -2.079735 |
| C | 4.540158  | 2.576656  | -1.612663 |
| C | 4.648576  | 2.804421  | -0.246383 |
| C | 4.164790  | 1.854922  | 0.647525  |

|   |           |           |           |
|---|-----------|-----------|-----------|
| C | 3.573653  | 0.688629  | 0.178290  |
| C | -2.939436 | -0.112796 | -0.572655 |
| C | -3.538472 | -1.214353 | -1.188567 |
| C | -4.347786 | -1.038977 | -2.302224 |
| C | -4.570090 | 0.238768  | -2.806965 |
| C | -3.990514 | 1.339854  | -2.189062 |
| C | -3.179668 | 1.165413  | -1.072840 |
| O | -2.506131 | -1.427629 | 1.806296  |
| H | 3.517169  | -3.389295 | -0.104736 |
| H | 2.936376  | -4.989191 | 1.673595  |
| H | 0.763811  | -4.854638 | 2.847212  |
| H | -0.894835 | -3.110297 | 2.279816  |
| H | -2.732520 | 2.031344  | -0.596189 |
| H | -4.171111 | 2.337462  | -2.573371 |
| H | -5.200855 | 0.375560  | -3.678283 |
| H | -4.807319 | -1.898831 | -2.776247 |
| H | -3.368189 | -2.207661 | -0.786743 |
| H | 0.663128  | 1.075210  | 1.208933  |
| H | 1.113962  | 3.252153  | 2.263034  |
| H | -0.738136 | 4.551945  | 3.276641  |
| H | -3.046057 | 3.652758  | 3.233734  |
| H | -3.504862 | 1.473528  | 2.165400  |
| H | 3.192355  | -0.046463 | 0.880348  |
| H | 4.249004  | 2.021353  | 1.715954  |
| H | 5.106600  | 3.716162  | 0.120022  |
| H | 4.912050  | 3.311528  | -2.318030 |
| H | 3.860405  | 1.239675  | -3.149166 |
| H | 1.067485  | 1.126705  | -1.783065 |
| C | -0.431197 | 0.087523  | -2.959014 |
| H | -0.535451 | 1.183986  | -1.099402 |
| H | -0.676512 | 0.960876  | -3.567858 |
| H | 0.276003  | -0.533096 | -3.514295 |
| H | -1.345258 | -0.487473 | -2.802253 |
| H | 2.501237  | -0.673412 | -2.749265 |

H 3.549418 -1.625231 -1.726113

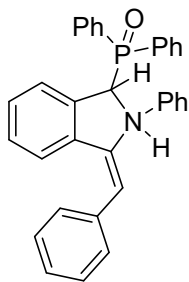

62

$E(\omega B97X-D/6-311+G^{**}) = -1744.2793309$

C 3.710198 -1.787605 -0.471523

C 2.635730 -1.388312 -1.264509

C 1.969148 -2.343895 -2.038244

C 2.334982 -3.680865 -1.977241

C 3.384843 -4.075270 -1.153898

C 4.079117 -3.126459 -0.414406

P 2.086149 0.343201 -1.388816

C 2.794508 1.278324 -0.001429

C 3.260064 2.556324 -0.318412

C 3.811944 3.363563 0.667553

C 3.912941 2.896294 1.972327

C 3.468390 1.617626 2.289224

C 2.911466 0.809716 1.307938

C 0.228383 0.210836 -1.260632

C -0.561819 1.492137 -1.092831

C -1.839985 1.218680 -0.607050

C -2.765658 2.248098 -0.455212

C -2.388957 3.543771 -0.786996

C -1.113752 3.809599 -1.280079

C -0.192684 2.779590 -1.447833

C -2.117492 -0.179061 -0.310214

C -2.997185 -1.071957 -0.092215

C -4.427628 -0.928904 0.025008

C -5.274713 -1.103951 -1.081523

|   |           |           |           |
|---|-----------|-----------|-----------|
| C | -6.648501 | -0.950510 | -0.957110 |
| C | -7.222581 | -0.634070 | 0.270051  |
| C | -6.394605 | -0.475315 | 1.377085  |
| C | -5.019612 | -0.623935 | 1.262852  |
| N | -0.424914 | -0.748638 | -0.335394 |
| C | 0.067574  | -0.902449 | 1.014250  |
| C | 0.680390  | -2.095507 | 1.374899  |
| C | 1.114113  | -2.280394 | 2.682647  |
| C | 0.926259  | -1.279126 | 3.626806  |
| C | 0.298492  | -0.093295 | 3.259618  |
| C | -0.135806 | 0.100460  | 1.957214  |
| O | 2.368604  | 1.006207  | -2.697522 |
| H | -3.760021 | 2.026176  | -0.084768 |
| H | -3.098394 | 4.354594  | -0.665460 |
| H | -0.837377 | 4.823320  | -1.545825 |
| H | 0.784087  | 2.975729  | -1.873045 |
| H | 4.263471  | -1.057986 | 0.106667  |
| H | 4.912780  | -3.426941 | 0.209772  |
| H | 3.670062  | -5.119876 | -1.102361 |
| H | 1.806646  | -4.413007 | -2.576824 |
| H | 1.168566  | -2.047503 | -2.708661 |
| H | 2.578062  | -0.185344 | 1.571527  |
| H | 3.551578  | 1.244461  | 3.303565  |
| H | 4.345037  | 3.526049  | 2.742074  |
| H | 4.168015  | 4.355334  | 0.414016  |
| H | 3.198540  | 2.899285  | -1.344990 |
| H | -4.841537 | -1.358160 | -2.042808 |
| H | -7.278352 | -1.083279 | -1.830913 |
| H | -8.296457 | -0.520767 | 0.363715  |
| H | -6.824200 | -0.235091 | 2.344455  |
| H | -4.384919 | -0.506556 | 2.134877  |
| H | 0.001954  | -0.164479 | -2.267712 |
| H | -0.515056 | -1.666432 | -0.758609 |
| H | -0.628619 | 1.022359  | 1.678948  |

|   |          |           |          |
|---|----------|-----------|----------|
| H | 0.141341 | 0.689176  | 3.992583 |
| H | 1.258146 | -1.425763 | 4.648171 |
| H | 1.593527 | -3.212020 | 2.959132 |
| H | 0.831064 | -2.875323 | 0.635976 |

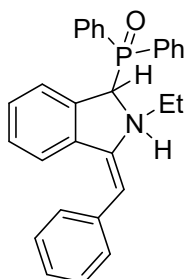

58

$E(\omega B97X-D/6-311+G^{**}) = -1591.878289$

|   |           |           |           |
|---|-----------|-----------|-----------|
| C | -2.290691 | 2.772903  | -0.734263 |
| C | -2.974770 | 1.570489  | -0.554205 |
| C | -4.324937 | 1.608240  | -0.192244 |
| C | -4.964009 | 2.821647  | 0.017309  |
| C | -4.264481 | 4.013491  | -0.138160 |
| C | -2.929652 | 3.988326  | -0.520370 |
| P | -2.244379 | -0.053983 | -0.934718 |
| O | -2.663317 | -0.619205 | -2.252521 |
| C | -2.699571 | -1.148980 | 0.445521  |
| C | -2.644202 | -2.521153 | 0.192232  |
| C | -2.926552 | -3.430697 | 1.202840  |
| C | -3.285753 | -2.977862 | 2.466553  |
| C | -3.373137 | -1.613005 | 2.716897  |
| C | -3.080872 | -0.701971 | 1.711621  |
| C | -0.393457 | 0.205332  | -0.992104 |
| N | 0.342397  | 0.871184  | 0.096023  |
| C | 2.080964  | 0.312017  | -0.132992 |
| C | 1.750558  | -0.895200 | -0.870787 |
| C | 0.441573  | -1.022709 | -1.333710 |
| C | 0.068056  | -2.117103 | -2.103007 |
| C | 1.005771  | -3.111180 | -2.362708 |



|   |           |           |           |
|---|-----------|-----------|-----------|
| C | 2.307664  | -2.999713 | -1.880750 |
| C | 2.690172  | -1.888140 | -1.143502 |
| C | -0.007250 | 0.671742  | 1.516613  |
| C | 2.958616  | 1.060949  | 0.378536  |
| C | 4.390313  | 1.045656  | 0.495888  |
| C | 5.018319  | 0.423671  | 1.588854  |
| C | 6.401447  | 0.403060  | 1.698530  |
| C | 7.201268  | 1.007786  | 0.734030  |
| C | 6.590282  | 1.638410  | -0.345212 |
| C | 5.208083  | 1.665177  | -0.464204 |
| H | 3.705436  | -1.774588 | -0.780353 |
| H | 3.031223  | -3.778882 | -2.092539 |
| H | 0.720757  | -3.971504 | -2.957480 |
| H | -0.931564 | -2.174078 | -2.517077 |
| H | -4.880646 | 0.683655  | -0.078876 |
| H | -6.010694 | 2.837189  | 0.298195  |
| H | -4.763253 | 4.961550  | 0.027574  |
| H | -2.384781 | 4.914538  | -0.660947 |
| H | -1.259355 | 2.783795  | -1.065984 |
| H | -3.152576 | 0.359014  | 1.921111  |
| H | -3.669190 | -1.256733 | 3.696911  |
| H | -3.507085 | -3.688447 | 3.254922  |
| H | -2.870643 | -4.493852 | 1.000177  |
| H | -2.384326 | -2.872735 | -0.798562 |
| H | 4.745025  | 2.165135  | -1.307832 |
| H | 7.197350  | 2.118935  | -1.105685 |
| H | 8.281188  | 0.993023  | 0.824909  |
| H | 6.859164  | -0.089667 | 2.550321  |
| H | 4.406482  | -0.044790 | 2.352534  |
| H | -0.322808 | 0.874727  | -1.860387 |
| H | 0.439578  | 1.864080  | -0.074138 |
| H | 0.668560  | 1.344085  | 2.053024  |
| H | -1.029078 | 1.019143  | 1.691354  |
| C | 0.201122  | -0.748281 | 2.020497  |

|   |           |           |          |
|---|-----------|-----------|----------|
| H | -0.176724 | -0.814065 | 3.043108 |
| H | -0.327540 | -1.491880 | 1.424875 |
| H | 1.261705  | -0.999968 | 2.023403 |

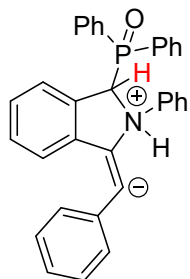

62

$$E(\omega\text{B97X-D/6-311+G**}) = -1744.280485$$

|   |           |           |           |
|---|-----------|-----------|-----------|
| C | 4.200829  | -1.439144 | -0.855589 |
| C | 2.814635  | -1.477399 | -1.031518 |
| C | 2.167686  | -2.713764 | -1.020885 |
| C | 2.881348  | -3.884063 | -0.793678 |
| C | 4.254316  | -3.831148 | -0.591070 |
| C | 4.914454  | -2.608002 | -0.632528 |
| P | 1.958120  | 0.079948  | -1.424881 |
| O | 2.148668  | 0.552564  | -2.828023 |
| C | 0.141423  | -0.278082 | -1.229624 |
| N | -0.416284 | -0.834182 | 0.053807  |
| C | -1.965634 | -0.545196 | -0.016880 |
| C | -2.013347 | 0.653143  | -0.855348 |
| C | -0.817738 | 0.855554  | -1.547688 |
| C | -3.087396 | 1.516610  | -1.051698 |
| C | -2.938391 | 2.573165  | -1.942782 |
| C | -1.748970 | 2.756901  | -2.644466 |
| C | -0.677111 | 1.886455  | -2.463079 |
| C | 0.155091  | -0.376161 | 1.320606  |
| C | -0.073352 | 0.919269  | 1.767601  |
| C | 0.420334  | 1.295975  | 3.005401  |
| C | 1.122367  | 0.387754  | 3.792976  |
| C | 1.336404  | -0.904137 | 3.336712  |

|   |           |           |           |
|---|-----------|-----------|-----------|
| C | 0.850314  | -1.291280 | 2.091990  |
| C | -2.746222 | -1.440244 | 0.538737  |
| C | -4.184439 | -1.233488 | 0.501666  |
| C | -4.845246 | -0.568993 | 1.548939  |
| C | -6.215857 | -0.353965 | 1.507186  |
| C | -6.974284 | -0.805326 | 0.430857  |
| C | -6.335442 | -1.484260 | -0.602212 |
| C | -4.964981 | -1.702355 | -0.567786 |
| C | 2.498097  | 1.309047  | -0.202370 |
| C | 3.163848  | 0.994062  | 0.982039  |
| C | 3.560239  | 2.002916  | 1.848374  |
| C | 3.282882  | 3.330470  | 1.546868  |
| C | 2.619524  | 3.651407  | 0.368069  |
| C | 2.238859  | 2.646922  | -0.510804 |
| H | -4.018600 | 1.353305  | -0.522581 |
| H | -3.765250 | 3.256453  | -2.101464 |
| H | -1.658932 | 3.575005  | -3.349810 |
| H | 0.235114  | 1.989112  | -3.038860 |
| H | 4.726187  | -0.491289 | -0.896635 |
| H | 5.988645  | -2.564189 | -0.495351 |
| H | 4.811978  | -4.743800 | -0.414775 |
| H | 2.364014  | -4.836356 | -0.785750 |
| H | 1.104008  | -2.792424 | -1.215361 |
| H | 3.358578  | -0.037586 | 1.245741  |
| H | 4.074932  | 1.747687  | 2.767404  |
| H | 3.587525  | 4.116607  | 2.228762  |
| H | 2.407868  | 4.686278  | 0.125322  |
| H | 1.749013  | 2.900472  | -1.442729 |
| H | -0.633291 | 1.619662  | 1.162130  |
| H | 0.251686  | 2.306177  | 3.358381  |
| H | 1.495729  | 0.688928  | 4.764898  |
| H | 1.871813  | -1.620861 | 3.948101  |
| H | 1.006305  | -2.303264 | 1.734354  |
| H | -4.480182 | -2.234950 | -1.379351 |

|   |           |           |           |
|---|-----------|-----------|-----------|
| H | -6.911217 | -1.849400 | -1.446803 |
| H | -8.045230 | -0.639810 | 0.402788  |
| H | -6.697836 | 0.169929  | 2.326704  |
| H | -4.265183 | -0.218297 | 2.396422  |
| H | -0.023912 | -1.061641 | -1.981092 |
| H | -0.386367 | -1.852052 | 0.062203  |

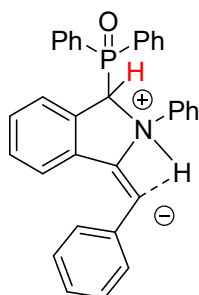

58

$E(\omega\text{B97X-D/6-311+G}^{**}) = -1744.261535$

|   |           |           |           |
|---|-----------|-----------|-----------|
| C | 3.800946  | -1.995555 | -1.224338 |
| C | 2.430430  | -1.767307 | -1.068840 |
| C | 1.595963  | -2.831825 | -0.731296 |
| C | 2.125964  | -4.101157 | -0.528519 |
| C | 3.490753  | -4.315943 | -0.668278 |
| C | 4.328114  | -3.262222 | -1.021081 |
| P | 1.828800  | -0.092015 | -1.436853 |
| O | 2.030571  | 0.330988  | -2.855875 |
| C | 0.001399  | -0.119598 | -1.119641 |
| N | -0.569441 | -0.487722 | 0.213668  |
| C | -1.991333 | 0.018016  | 0.135972  |
| C | -1.935660 | 1.215073  | -0.700429 |
| C | -0.760158 | 1.160509  | -1.466384 |
| C | -2.854506 | 2.236440  | -0.893411 |
| C | -2.580009 | 3.206642  | -1.854495 |
| C | -1.421203 | 3.142030  | -2.620461 |
| C | -0.504420 | 2.104458  | -2.445151 |
| C | 0.138571  | -0.084381 | 1.416140  |
| C | 0.198776  | 1.247343  | 1.816939  |

|   |           |           |           |
|---|-----------|-----------|-----------|
| C | 0.833374  | 1.570090  | 3.005705  |
| C | 1.396359  | 0.573487  | 3.797664  |
| C | 1.325038  | -0.751961 | 3.394836  |
| C | 0.692925  | -1.083754 | 2.201045  |
| C | -2.741084 | -1.045572 | 0.437010  |
| C | -4.199339 | -1.046483 | 0.445090  |
| C | -4.902943 | -2.094965 | -0.162137 |
| C | -6.290398 | -2.100440 | -0.191159 |
| C | -7.010176 | -1.077664 | 0.419128  |
| C | -6.327702 | -0.046634 | 1.055620  |
| C | -4.939107 | -0.027976 | 1.064244  |
| C | 2.660702  | 1.022760  | -0.269505 |
| C | 3.379763  | 0.576371  | 0.838182  |
| C | 4.012059  | 1.489246  | 1.671388  |
| C | 3.923428  | 2.850563  | 1.409292  |
| C | 3.210377  | 3.301347  | 0.303754  |
| C | 2.589311  | 2.391488  | -0.540040 |
| H | -3.767591 | 2.270140  | -0.312028 |
| H | -3.283572 | 4.016368  | -2.012443 |
| H | -1.230295 | 3.899169  | -3.372390 |
| H | 0.378487  | 2.020977  | -3.067972 |
| H | 4.454990  | -1.178321 | -1.510137 |
| H | 5.392086  | -3.429222 | -1.142962 |
| H | 3.902585  | -5.306386 | -0.510819 |
| H | 1.468217  | -4.921890 | -0.266484 |
| H | 0.527309  | -2.689560 | -0.625289 |
| H | 3.435226  | -0.481324 | 1.064736  |
| H | 4.565752  | 1.134539  | 2.533017  |
| H | 4.414064  | 3.561815  | 2.064549  |
| H | 3.146581  | 4.362475  | 0.091645  |
| H | 2.055438  | 2.740959  | -1.415622 |
| H | -0.241041 | 2.023624  | 1.203870  |
| H | 0.891124  | 2.607380  | 3.313802  |
| H | 1.887343  | 0.833435  | 4.728492  |

|   |           |           |           |
|---|-----------|-----------|-----------|
| H | 1.752830  | -1.535061 | 4.010133  |
| H | 0.622306  | -2.116709 | 1.882448  |
| H | -4.408937 | 0.769036  | 1.575778  |
| H | -6.880096 | 0.747354  | 1.547096  |
| H | -8.094295 | -1.090475 | 0.408257  |
| H | -6.814961 | -2.913581 | -0.681423 |
| H | -4.342540 | -2.904160 | -0.617844 |
| H | -0.346478 | -0.897456 | -1.815478 |
| H | -1.232290 | -1.491290 | 0.390117  |

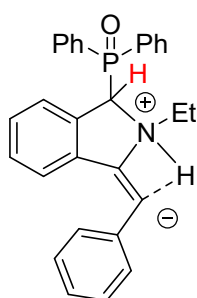

58

$E(\omega B97X-D/6-311+G^{**}) = -1591.862394$

|   |           |           |           |
|---|-----------|-----------|-----------|
| C | -2.756716 | -2.406021 | -0.031904 |
| C | -2.775127 | -1.035193 | 0.234047  |
| C | -3.375282 | -0.570578 | 1.404359  |
| C | -3.916678 | -1.467756 | 2.315665  |
| C | -3.867671 | -2.833311 | 2.060143  |
| C | -3.294652 | -3.301026 | 0.882867  |
| P | -2.014489 | 0.064164  | -0.998835 |
| C | -0.169354 | 0.117046  | -0.787623 |
| N | 0.503305  | 0.580265  | 0.460255  |
| C | 1.900348  | 0.049402  | 0.333790  |
| C | 1.788176  | -1.200386 | -0.414786 |
| C | 0.566203  | -1.185761 | -1.105406 |
| C | 0.247205  | -2.186735 | -2.006669 |
| C | 1.147111  | -3.239271 | -2.175011 |
| C | 2.351580  | -3.265221 | -1.479932 |
| C | 2.689317  | -2.238942 | -0.601769 |

|   |           |           |           |
|---|-----------|-----------|-----------|
| C | -0.113277 | 0.302255  | 1.778628  |
| C | 2.684470  | 1.112680  | 0.541610  |
| C | 4.142195  | 1.092650  | 0.492805  |
| C | 4.833428  | 2.107815  | -0.181635 |
| C | 6.218600  | 2.094440  | -0.265411 |
| C | 6.950473  | 1.086021  | 0.354337  |
| C | 6.282282  | 0.088536  | 1.056005  |
| C | 4.895009  | 0.089105  | 1.120602  |
| C | -2.643306 | 1.727949  | -0.625092 |
| C | -3.998244 | 1.946279  | -0.893182 |
| C | -4.564518 | 3.191053  | -0.663108 |
| C | -3.782219 | 4.230932  | -0.169578 |
| C | -2.433339 | 4.024545  | 0.086809  |
| C | -1.862660 | 2.776761  | -0.141432 |
| O | -2.294228 | -0.393986 | -2.393223 |
| H | 3.638691  | -2.242640 | -0.080576 |
| H | 3.041575  | -4.087661 | -1.631969 |
| H | 0.908139  | -4.038440 | -2.867417 |
| H | -0.669327 | -2.133502 | -2.582407 |
| H | -4.604669 | 1.139550  | -1.291594 |
| H | -5.615252 | 3.352849  | -0.874200 |
| H | -4.224675 | 5.204622  | 0.008054  |
| H | -1.818474 | 4.834889  | 0.460891  |
| H | -0.807116 | 2.638688  | 0.056958  |
| H | -3.425999 | 0.493881  | 1.607006  |
| H | -4.381017 | -1.099737 | 3.223407  |
| H | -4.287158 | -3.533133 | 2.774169  |
| H | -3.269319 | -4.364261 | 0.674182  |
| H | -2.323822 | -2.768193 | -0.956398 |
| H | 4.377409  | -0.682170 | 1.682205  |
| H | 6.844676  | -0.693925 | 1.554574  |
| H | 8.033351  | 1.084105  | 0.299824  |
| H | 6.732439  | 2.881583  | -0.806769 |
| H | 4.264277  | 2.905813  | -0.646089 |

|   |           |           |           |
|---|-----------|-----------|-----------|
| H | 0.111530  | 0.845666  | -1.563366 |
| H | 1.198884  | 1.588624  | 0.515378  |
| H | 0.469151  | 0.906438  | 2.480634  |
| H | -1.125126 | 0.709273  | 1.766385  |
| C | -0.098403 | -1.151870 | 2.222989  |
| H | -0.611145 | -1.230938 | 3.184520  |
| H | -0.605152 | -1.810283 | 1.517879  |
| H | 0.926453  | -1.505922 | 2.348536  |

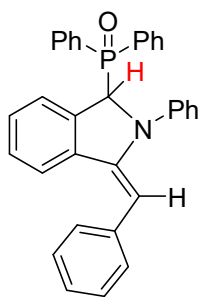

62

$E(\omega\text{B97X-D/6-311+G}^{**}) = -1744.395484$

|   |           |           |           |
|---|-----------|-----------|-----------|
| C | -3.185402 | -0.682703 | 1.679859  |
| C | -3.000898 | -0.730209 | 0.299750  |
| C | -3.867343 | -0.017931 | -0.533238 |
| C | -4.880499 | 0.757642  | 0.007946  |
| C | -5.047532 | 0.816109  | 1.387812  |
| C | -4.207124 | 0.089878  | 2.221001  |
| P | -1.684398 | -1.701967 | -0.490609 |
| O | -2.165734 | -2.819054 | -1.360539 |
| C | -0.694086 | -0.474809 | -1.498139 |
| N | -0.292336 | 0.708540  | -0.757164 |
| C | 1.100895  | 0.790453  | -0.577491 |
| C | 1.659670  | -0.372621 | -1.298852 |
| C | 0.615913  | -1.096802 | -1.872069 |
| C | 2.976152  | -0.762529 | -1.535035 |
| C | 3.210907  | -1.890008 | -2.311124 |
| C | 2.156327  | -2.624885 | -2.851145 |
| C | 0.841613  | -2.231362 | -2.636524 |



|   |           |           |           |
|---|-----------|-----------|-----------|
| C | -1.162786 | 1.820419  | -0.613109 |
| C | -1.525240 | 2.273373  | 0.652589  |
| C | -2.405518 | 3.337450  | 0.787036  |
| C | -2.936279 | 3.952903  | -0.341090 |
| C | -2.570390 | 3.508098  | -1.605751 |
| C | -1.678826 | 2.451630  | -1.742123 |
| C | 1.711691  | 1.784362  | 0.091531  |
| C | 3.141823  | 1.850140  | 0.447382  |
| C | 3.756198  | 0.820847  | 1.168857  |
| C | 5.094158  | 0.902407  | 1.531951  |
| C | 5.842886  | 2.025733  | 1.197164  |
| C | 5.239620  | 3.066493  | 0.499807  |
| C | 3.902596  | 2.979760  | 0.131882  |
| C | -0.531911 | -2.242575 | 0.806173  |
| C | 0.081063  | -1.370478 | 1.709142  |
| C | 1.026309  | -1.848757 | 2.605697  |
| C | 1.364100  | -3.198509 | 2.607110  |
| C | 0.756216  | -4.069416 | 1.711354  |
| C | -0.187524 | -3.593226 | 0.808982  |
| H | 3.806709  | -0.201064 | -1.130803 |
| H | 4.232414  | -2.200574 | -2.499647 |
| H | 2.363544  | -3.505849 | -3.448041 |
| H | 0.008048  | -2.793991 | -3.040417 |
| H | -2.533648 | -1.245815 | 2.337513  |
| H | -4.344474 | 0.123122  | 3.295955  |
| H | -5.837622 | 1.425639  | 1.812102  |
| H | -5.536749 | 1.320615  | -0.645370 |
| H | -3.745739 | -0.063039 | -1.610360 |
| H | -0.165003 | -0.315947 | 1.703525  |
| H | 1.500779  | -1.165999 | 3.301737  |
| H | 2.103764  | -3.570314 | 3.307606  |
| H | 1.020676  | -5.120687 | 1.709875  |
| H | -0.660894 | -4.256613 | 0.093341  |
| H | -1.131008 | 1.773052  | 1.528839  |

|   |           |           |           |
|---|-----------|-----------|-----------|
| H | -2.691826 | 3.674320  | 1.776728  |
| H | -3.632541 | 4.776896  | -0.234379 |
| H | -2.973336 | 3.989053  | -2.490013 |
| H | -1.380422 | 2.110410  | -2.727507 |
| H | 3.438454  | 3.791785  | -0.418379 |
| H | 5.813527  | 3.948738  | 0.237892  |
| H | 6.886448  | 2.092511  | 1.483563  |
| H | 5.551676  | 0.089472  | 2.085531  |
| H | 3.171915  | -0.053659 | 1.436887  |
| H | -1.308030 | -0.241148 | -2.376109 |
| H | 1.100873  | 2.615992  | 0.429524  |

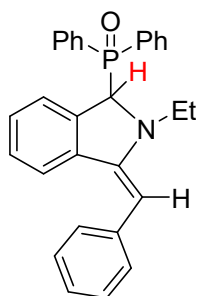

58

$$E(\omega B97X-D/6-311+G^{**}) = -1591.993333$$

|   |          |           |           |
|---|----------|-----------|-----------|
| C | 2.961240 | -1.236083 | 1.419951  |
| C | 3.229260 | -0.737800 | 0.145091  |
| C | 4.236436 | -1.318490 | -0.627110 |
| C | 4.951554 | -2.404462 | -0.137063 |
| C | 4.668359 | -2.909924 | 1.126703  |
| C | 3.678559 | -2.321046 | 1.906717  |
| P | 2.281968 | 0.603645  | -0.636021 |
| O | 3.068298 | 1.329217  | -1.682530 |
| C | 1.656832 | 1.692871  | 0.676409  |
| C | 2.188705 | 2.981469  | 0.709944  |
| C | 1.745753 | 3.893213  | 1.660235  |
| C | 0.762711 | 3.526529  | 2.571174  |
| C | 0.220446 | 2.246443  | 2.532791  |
| C | 0.664640 | 1.328625  | 1.590739  |

|   |           |           |           |
|---|-----------|-----------|-----------|
| C | 0.787881  | -0.219494 | -1.396669 |
| N | 0.111848  | -1.164420 | -0.522230 |
| C | -1.232233 | -0.809693 | -0.319431 |
| C | -1.433546 | 0.478189  | -1.013636 |
| C | -0.261906 | 0.807980  | -1.691187 |
| C | -0.141836 | 1.984727  | -2.416134 |
| C | -1.232008 | 2.844554  | -2.452855 |
| C | -2.400661 | 2.537360  | -1.756490 |
| C | -2.511908 | 1.360262  | -1.028540 |
| C | 0.506877  | -2.565857 | -0.585241 |
| C | -0.130031 | -3.324540 | -1.747581 |
| C | -2.091147 | -1.541275 | 0.415353  |
| C | -3.536786 | -1.289112 | 0.582897  |
| C | -4.087276 | -1.142999 | 1.859556  |
| C | -5.449821 | -0.931498 | 2.031118  |
| C | -6.291795 | -0.866426 | 0.926512  |
| C | -5.760749 | -1.025495 | -0.348907 |
| C | -4.399347 | -1.243512 | -0.516741 |
| H | -3.419580 | 1.143276  | -0.482425 |
| H | -3.234269 | 3.230236  | -1.777117 |
| H | -1.167561 | 3.770160  | -3.013578 |
| H | 0.789430  | 2.230394  | -2.913558 |
| H | 2.196350  | -0.779886 | 2.036591  |
| H | 3.467673  | -2.705278 | 2.898331  |
| H | 5.226361  | -3.757339 | 1.509255  |
| H | 5.733676  | -2.852079 | -0.739720 |
| H | 4.458778  | -0.904455 | -1.604874 |
| H | 0.220693  | 0.340651  | 1.558048  |
| H | -0.557485 | 1.962698  | 3.232454  |
| H | 0.412109  | 4.240921  | 3.307834  |
| H | 2.163349  | 4.893402  | 1.682797  |
| H | 2.938568  | 3.260811  | -0.022110 |
| H | -1.706531 | -2.419966 | 0.924592  |
| H | -3.988738 | -1.374191 | -1.512339 |

|   |           |           |           |
|---|-----------|-----------|-----------|
| H | -6.410281 | -0.988355 | -1.216672 |
| H | -7.354918 | -0.700172 | 1.059056  |
| H | -5.854878 | -0.813388 | 3.030263  |
| H | -3.433268 | -1.184664 | 2.724712  |
| H | 1.174101  | -0.698730 | -2.307003 |
| H | 0.266107  | -3.045322 | 0.366910  |
| H | 1.594480  | -2.598105 | -0.663602 |
| H | 0.213731  | -4.361840 | -1.756241 |
| H | -1.218949 | -3.322696 | -1.666450 |
| H | 0.142992  | -2.870654 | -2.704622 |

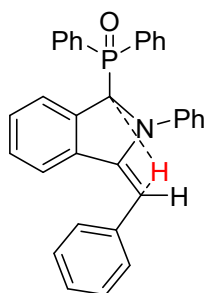

62

$$E(\omega\text{B97X-D/6-311+G}^{**}) = -1744.262203$$

|   |           |           |           |
|---|-----------|-----------|-----------|
| C | 1.003124  | -1.492050 | -2.587026 |
| C | 1.973260  | -0.761315 | -1.896463 |
| C | 3.288487  | -1.220030 | -1.874046 |
| C | 3.621281  | -2.417655 | -2.497584 |
| C | 2.646825  | -3.154283 | -3.158265 |
| C | 1.337318  | -2.685370 | -3.209962 |
| P | 1.506854  | 0.854085  | -1.205775 |
| C | 2.709204  | 1.306686  | 0.086031  |
| C | 2.990162  | 2.671233  | 0.176586  |
| C | 3.858751  | 3.142203  | 1.152704  |
| C | 4.457433  | 2.253867  | 2.038171  |
| C | 4.189474  | 0.892711  | 1.945068  |
| C | 3.317843  | 0.417643  | 0.974307  |
| C | -0.116756 | 0.639775  | -0.339718 |
| N | -0.219221 | 0.250633  | 1.033180  |

|   |           |           |           |
|---|-----------|-----------|-----------|
| C | -1.615795 | 0.330922  | 1.205455  |
| C | -2.020806 | 1.566999  | 0.571482  |
| C | -1.086801 | 1.738228  | -0.461465 |
| C | -1.276450 | 2.749400  | -1.414189 |
| C | -2.392804 | 3.554947  | -1.286287 |
| C | -3.332250 | 3.363818  | -0.259050 |
| C | -3.166327 | 2.353317  | 0.667859  |
| C | 0.473383  | -0.863016 | 1.587846  |
| C | 0.815257  | -1.996792 | 0.856765  |
| C | 1.538286  | -3.018211 | 1.462209  |
| C | 1.902923  | -2.923167 | 2.799396  |
| C | 1.529458  | -1.803535 | 3.537193  |
| C | 0.820635  | -0.775282 | 2.933977  |
| C | -2.211731 | -0.855420 | 0.714832  |
| C | -3.663474 | -0.974527 | 0.405152  |
| C | -4.199147 | -0.380425 | -0.737694 |
| C | -5.550770 | -0.507049 | -1.030528 |
| C | -6.384722 | -1.227787 | -0.182979 |
| C | -5.858581 | -1.828875 | 0.955016  |
| C | -4.504640 | -1.707755 | 1.242366  |
| O | 1.412959  | 1.897859  | -2.272533 |
| H | -1.291732 | -0.518119 | -0.519951 |
| H | -3.898474 | 2.173374  | 1.445967  |
| H | -4.198501 | 4.013248  | -0.201047 |
| H | -2.546518 | 4.358842  | -1.997951 |
| H | -0.551917 | 2.897649  | -2.203431 |
| H | 4.059422  | -0.647018 | -1.372450 |
| H | 4.645559  | -2.771646 | -2.469432 |
| H | 2.907761  | -4.088768 | -3.642396 |
| H | 0.576833  | -3.249772 | -3.737484 |
| H | -0.019855 | -1.132320 | -2.622603 |
| H | 3.118626  | -0.645510 | 0.917109  |
| H | 4.657458  | 0.195320  | 2.630528  |
| H | 5.137237  | 2.621478  | 2.798973  |

|   |           |           |           |
|---|-----------|-----------|-----------|
| H | 4.071007  | 4.203250  | 1.217785  |
| H | 2.529816  | 3.351787  | -0.531244 |
| H | 0.554622  | 0.119910  | 3.482969  |
| H | 1.806537  | -1.723031 | 4.582166  |
| H | 2.470637  | -3.719378 | 3.267315  |
| H | 1.811549  | -3.891465 | 0.880848  |
| H | 0.523058  | -2.082910 | -0.179166 |
| H | -4.094292 | -2.179764 | 2.129473  |
| H | -6.502368 | -2.396091 | 1.618026  |
| H | -7.440360 | -1.324689 | -0.410815 |
| H | -5.953138 | -0.040644 | -1.922754 |
| H | -3.549807 | 0.186819  | -1.396330 |
| H | -1.747412 | -1.794358 | 1.007587  |

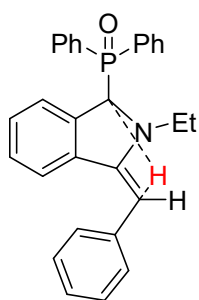

58

$$E(\omega B97X-D/6-311+G^{**}) = -1591.864789$$

|   |           |           |           |
|---|-----------|-----------|-----------|
| C | -2.751863 | -1.464487 | 1.258960  |
| C | -2.904417 | -1.113080 | -0.082255 |
| C | -4.047899 | -1.510940 | -0.777978 |
| C | -5.039720 | -2.235085 | -0.130093 |
| C | -4.891072 | -2.571961 | 1.211419  |
| C | -3.746620 | -2.191932 | 1.902426  |
| P | -1.671544 | -0.142239 | -1.003050 |
| C | -2.184010 | 1.596244  | -0.842662 |
| C | -1.392086 | 2.557068  | -1.475341 |
| C | -1.726511 | 3.901140  | -1.390789 |
| C | -2.856640 | 4.293726  | -0.679576 |
| C | -3.655941 | 3.340083  | -0.061356 |

|   |           |           |           |
|---|-----------|-----------|-----------|
| C | -3.322326 | 1.992616  | -0.143692 |
| C | -0.067466 | -0.279251 | -0.134123 |
| N | 0.175967  | 0.072917  | 1.233186  |
| C | 1.562332  | -0.174723 | 1.270380  |
| C | 1.749671  | -1.457086 | 0.610719  |
| C | 0.720322  | -1.498320 | -0.340691 |
| C | 2.780223  | -2.392961 | 0.606671  |
| C | 2.720728  | -3.410102 | -0.326812 |
| C | 1.680650  | -3.464904 | -1.269670 |
| C | 0.679822  | -2.510531 | -1.304187 |
| C | 2.270192  | 0.914962  | 0.734372  |
| C | 3.683536  | 0.828736  | 0.275331  |
| C | 4.706869  | 1.381940  | 1.044945  |
| C | 6.029595  | 1.300651  | 0.627465  |
| C | 6.342131  | 0.675238  | -0.574398 |
| C | 5.326722  | 0.133753  | -1.354663 |
| C | 4.006001  | 0.209002  | -0.931918 |
| C | -0.353078 | 1.326906  | 1.753525  |
| C | 0.064730  | 1.554694  | 3.197161  |
| O | -1.523343 | -0.565260 | -2.428676 |
| H | 1.075463  | 0.669359  | -0.461291 |
| H | 3.597468  | -2.323982 | 1.314721  |
| H | 3.491410  | -4.172542 | -0.342514 |
| H | 1.663070  | -4.275191 | -1.990295 |
| H | -0.106364 | -2.533260 | -2.048671 |
| H | -3.946349 | 1.251922  | 0.344794  |
| H | -4.542044 | 3.643571  | 0.484601  |
| H | -3.117120 | 5.344271  | -0.613505 |
| H | -1.107572 | 4.643515  | -1.881803 |
| H | -0.515055 | 2.246849  | -2.033317 |
| H | -1.849627 | -1.191057 | 1.795323  |
| H | -3.622333 | -2.469696 | 2.942966  |
| H | -5.664348 | -3.140765 | 1.715780  |
| H | -5.925668 | -2.543058 | -0.673699 |

|   |           |           |           |
|---|-----------|-----------|-----------|
| H | -4.146880 | -1.260566 | -1.828885 |
| H | 4.464488  | 1.872390  | 1.982633  |
| H | 6.816122  | 1.728647  | 1.239017  |
| H | 7.373381  | 0.614236  | -0.903726 |
| H | 5.562440  | -0.350137 | -2.295781 |
| H | 3.214022  | -0.218281 | -1.538080 |
| H | 1.974294  | 1.914162  | 1.044697  |
| H | -0.076070 | 2.175340  | 1.112758  |
| H | -1.440537 | 1.257568  | 1.705229  |
| H | -0.396481 | 2.471582  | 3.570477  |
| H | -0.258577 | 0.722375  | 3.826326  |
| H | 1.147432  | 1.651059  | 3.299577  |

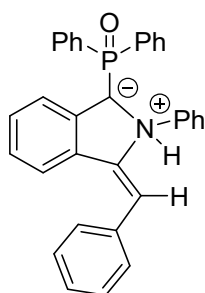

62

$E(\omega B97X-D/6-311+G^{**}) = -1744.316418$

|   |           |           |           |
|---|-----------|-----------|-----------|
| C | -3.539217 | -1.767459 | -1.579281 |
| C | -2.299015 | -1.802519 | -0.937643 |
| C | -1.226504 | -2.432669 | -1.575484 |
| C | -1.381427 | -2.991076 | -2.840049 |
| C | -2.615216 | -2.932320 | -3.475917 |
| C | -3.695493 | -2.327857 | -2.840121 |
| P | -2.041174 | -1.149177 | 0.760833  |
| O | -2.423762 | -2.114527 | 1.837688  |
| C | -0.349598 | -0.676571 | 0.874639  |
| N | 0.269624  | 0.130651  | -0.232106 |
| C | 1.773264  | -0.043593 | -0.095570 |
| C | 1.945392  | -1.174963 | 0.791441  |
| C | 0.694479  | -1.514355 | 1.360057  |



|   |           |           |           |
|---|-----------|-----------|-----------|
| C | 3.102897  | -1.898508 | 1.090656  |
| C | 3.027374  | -2.955211 | 1.977396  |
| C | 1.793060  | -3.281723 | 2.563395  |
| C | 0.636647  | -2.588029 | 2.273094  |
| C | -0.162156 | 1.530424  | -0.325980 |
| C | -0.292565 | 2.278522  | 0.831058  |
| C | -0.705920 | 3.596867  | 0.724296  |
| C | -0.978670 | 4.151848  | -0.523296 |
| C | -0.840828 | 3.386051  | -1.672231 |
| C | -0.430908 | 2.060617  | -1.575337 |
| C | 2.581145  | 0.797427  | -0.749374 |
| C | 4.052729  | 0.834554  | -0.649976 |
| C | 4.696022  | 0.888042  | 0.589313  |
| C | 6.079908  | 0.961320  | 0.664311  |
| C | 6.844371  | 0.990292  | -0.497444 |
| C | 6.213876  | 0.953867  | -1.735593 |
| C | 4.828543  | 0.882920  | -1.810489 |
| C | -3.053849 | 0.374207  | 0.838997  |
| C | -3.379863 | 1.179450  | -0.251049 |
| C | -4.075009 | 2.368513  | -0.066087 |
| C | -4.455081 | 2.760158  | 1.211542  |
| C | -4.144989 | 1.956056  | 2.303550  |
| C | -3.450161 | 0.768337  | 2.118327  |
| H | 4.046751  | -1.640886 | 0.626969  |
| H | 3.913707  | -3.530332 | 2.216180  |
| H | 1.743121  | -4.112301 | 3.260201  |
| H | -0.314842 | -2.860510 | 2.711092  |
| H | -4.388936 | -1.306857 | -1.087262 |
| H | -4.663874 | -2.298211 | -3.327120 |
| H | -2.739916 | -3.367950 | -4.461023 |
| H | -0.542445 | -3.481838 | -3.320503 |
| H | -0.272632 | -2.525203 | -1.061018 |
| H | -3.087024 | 0.888174  | -1.253187 |
| H | -4.316550 | 2.989480  | -0.921562 |

|   |           |           |           |
|---|-----------|-----------|-----------|
| H | -4.997680 | 3.688034  | 1.356280  |
| H | -4.450072 | 2.252420  | 3.301058  |
| H | -3.212081 | 0.129272  | 2.961979  |
| H | -0.111205 | 1.806697  | 1.788695  |
| H | -0.831425 | 4.190528  | 1.621705  |
| H | -1.310023 | 5.181133  | -0.595946 |
| H | -1.060817 | 3.810921  | -2.644410 |
| H | -0.336322 | 1.445757  | -2.465652 |
| H | 4.340432  | 0.855331  | -2.779469 |
| H | 6.801604  | 0.981477  | -2.646351 |
| H | 7.925274  | 1.047421  | -0.437521 |
| H | 6.562990  | 1.001015  | 1.634180  |
| H | 4.102574  | 0.868047  | 1.496593  |
| H | 2.135835  | 1.542146  | -1.401099 |
| H | 0.024471  | -0.310168 | -1.128979 |

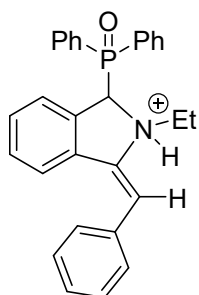

58

E( $\omega$ B97X-D/6-311+G\*\*) = -1591.932044

|   |           |           |           |
|---|-----------|-----------|-----------|
| C | -2.788023 | -1.472662 | -1.435556 |
| C | -3.141919 | -1.038996 | -0.157482 |
| C | -4.294425 | -1.536596 | 0.447745  |
| C | -5.092771 | -2.454687 | -0.225493 |
| C | -4.741441 | -2.877608 | -1.501868 |
| C | -3.587359 | -2.387757 | -2.106256 |
| P | -2.165828 | 0.180553  | 0.777892  |
| O | -2.659325 | 0.301272  | 2.193061  |
| C | -2.383713 | 1.803126  | -0.058422 |
| C | -3.022363 | 2.822713  | 0.645470  |

|   |           |           |           |
|---|-----------|-----------|-----------|
| C | -3.186363 | 4.077114  | 0.067087  |
| C | -2.711784 | 4.320916  | -1.216470 |
| C | -2.073798 | 3.307946  | -1.926270 |
| C | -1.910771 | 2.054224  | -1.349090 |
| C | -0.504560 | -0.197961 | 0.416296  |
| N | 0.505859  | 0.887041  | 0.550889  |
| C | 1.825122  | 0.281575  | 0.189932  |
| C | 1.617852  | -1.152950 | 0.193706  |
| C | 0.227197  | -1.407547 | 0.340789  |
| C | -0.212511 | -2.746779 | 0.352023  |
| C | 0.706049  | -3.760631 | 0.168993  |
| C | 2.070672  | -3.499819 | -0.022404 |
| C | 2.525812  | -2.193353 | -0.008351 |
| C | 0.547397  | 1.538647  | 1.921300  |
| C | 0.813427  | 0.547023  | 3.032017  |
| C | 2.833198  | 1.119186  | -0.086207 |
| C | 4.237073  | 0.742489  | -0.337227 |
| C | 4.955855  | -0.016751 | 0.589109  |
| C | 6.285910  | -0.342607 | 0.358503  |
| C | 6.921017  | 0.093343  | -0.798915 |
| C | 6.219979  | 0.863715  | -1.719993 |
| C | 4.890368  | 1.190488  | -1.487870 |
| H | 3.577906  | -1.985700 | -0.153112 |
| H | 2.766292  | -4.316799 | -0.169711 |
| H | 0.359861  | -4.789096 | 0.177578  |
| H | -1.259712 | -2.978569 | 0.499271  |
| H | -4.545378 | -1.201487 | 1.448294  |
| H | -5.987393 | -2.842308 | 0.248898  |
| H | -5.363289 | -3.595483 | -2.025535 |
| H | -3.305391 | -2.727983 | -3.096332 |
| H | -1.869783 | -1.115654 | -1.888683 |
| H | -1.417849 | 1.260387  | -1.903038 |
| H | -1.708155 | 3.493931  | -2.930122 |
| H | -2.840004 | 5.299273  | -1.666294 |

|   |           |           |           |
|---|-----------|-----------|-----------|
| H | -3.685397 | 4.865449  | 0.619689  |
| H | -3.381596 | 2.612384  | 1.647421  |
| H | 4.345973  | 1.789410  | -2.210684 |
| H | 6.709824  | 1.210542  | -2.622931 |
| H | 7.959298  | -0.160647 | -0.979428 |
| H | 6.828792  | -0.933614 | 1.087573  |
| H | 4.464018  | -0.349382 | 1.496900  |
| H | 2.613695  | 2.184352  | -0.128604 |
| H | 0.290457  | 1.631740  | -0.114585 |
| H | 1.322301  | 2.307431  | 1.865732  |
| H | -0.424606 | 2.017292  | 2.053659  |
| H | 0.814173  | 1.088499  | 3.979918  |
| H | 0.024255  | -0.204113 | 3.071548  |
| H | 1.781929  | 0.057590  | 2.912926  |

TS-2

62

$E(\omega B97X-D/6-311+G^{**}) = -1744.2793$

|   |           |           |           |
|---|-----------|-----------|-----------|
| C | 3.710198  | -1.787605 | -0.471523 |
| C | 2.635730  | -1.388312 | -1.264509 |
| C | 1.969148  | -2.343895 | -2.038244 |
| C | 2.334982  | -3.680865 | -1.977241 |
| C | 3.384843  | -4.075270 | -1.153898 |
| C | 4.079117  | -3.126459 | -0.414406 |
| P | 2.086149  | 0.343201  | -1.388816 |
| C | 2.794508  | 1.278324  | -0.001429 |
| C | 3.260064  | 2.556324  | -0.318412 |
| C | 3.811944  | 3.363563  | 0.667553  |
| C | 3.912941  | 2.896294  | 1.972327  |
| C | 3.468390  | 1.617626  | 2.289224  |
| C | 2.911466  | 0.809716  | 1.307938  |
| C | 0.228383  | 0.210836  | -1.260632 |
| C | -0.561819 | 1.492137  | -1.092831 |
| C | -1.839985 | 1.218680  | -0.607050 |

|   |           |           |           |
|---|-----------|-----------|-----------|
| C | -2.765658 | 2.248098  | -0.455212 |
| C | -2.388957 | 3.543771  | -0.786996 |
| C | -1.113752 | 3.809599  | -1.280079 |
| C | -0.192684 | 2.779590  | -1.447833 |
| C | -2.117492 | -0.179061 | -0.310214 |
| C | -2.997185 | -1.071957 | -0.092215 |
| C | -4.427628 | -0.928904 | 0.025008  |
| C | -5.274713 | -1.103951 | -1.081523 |
| C | -6.648501 | -0.950510 | -0.957110 |
| C | -7.222581 | -0.634070 | 0.270051  |
| C | -6.394605 | -0.475315 | 1.377085  |
| C | -5.019612 | -0.623935 | 1.262852  |
| N | -0.424914 | -0.748638 | -0.335394 |
| C | 0.067574  | -0.902449 | 1.014250  |
| C | 0.680390  | -2.095507 | 1.374899  |
| C | 1.114113  | -2.280394 | 2.682647  |
| C | 0.926259  | -1.279126 | 3.626806  |
| C | 0.298492  | -0.093295 | 3.259618  |
| C | -0.135806 | 0.100460  | 1.957214  |
| O | 2.368604  | 1.006207  | -2.697522 |
| H | -3.760021 | 2.026176  | -0.084768 |
| H | -3.098394 | 4.354594  | -0.665460 |
| H | -0.837377 | 4.823320  | -1.545825 |
| H | 0.784087  | 2.975729  | -1.873045 |
| H | 4.263471  | -1.057986 | 0.106667  |
| H | 4.912780  | -3.426941 | 0.209772  |
| H | 3.670062  | -5.119876 | -1.102361 |
| H | 1.806646  | -4.413007 | -2.576824 |
| H | 1.168566  | -2.047503 | -2.708661 |
| H | 2.578062  | -0.185344 | 1.571527  |
| H | 3.551578  | 1.244461  | 3.303565  |
| H | 4.345037  | 3.526049  | 2.742074  |
| H | 4.168015  | 4.355334  | 0.414016  |
| H | 3.198540  | 2.899285  | -1.344990 |

|   |           |           |           |
|---|-----------|-----------|-----------|
| H | -4.841537 | -1.358160 | -2.042808 |
| H | -7.278352 | -1.083279 | -1.830913 |
| H | -8.296457 | -0.520767 | 0.363715  |
| H | -6.824200 | -0.235091 | 2.344455  |
| H | -4.384919 | -0.506556 | 2.134877  |
| H | 0.001954  | -0.164479 | -2.267712 |
| H | -0.515056 | -1.666432 | -0.758609 |
| H | -0.628619 | 1.022359  | 1.678948  |
| H | 0.141341  | 0.689176  | 3.992583  |
| H | 1.258146  | -1.425763 | 4.648171  |
| H | 1.593527  | -3.212020 | 2.959132  |
| H | 0.831064  | -2.875323 | 0.635976  |

64

TS-1 in the presence of CuCl  $E(\omega\text{B97X-D/6-311+G}^{**}) = -3845.138929$

|    |           |           |           |
|----|-----------|-----------|-----------|
| C  | 2.092152  | 0.966721  | -2.270754 |
| C  | 2.408566  | 0.836422  | -0.914903 |
| C  | 3.676841  | 1.216529  | -0.462710 |
| C  | 4.612257  | 1.719326  | -1.356154 |
| C  | 4.289096  | 1.856119  | -2.701533 |
| C  | 3.029769  | 1.477891  | -3.156395 |
| C  | 1.415099  | 0.369074  | 0.042707  |
| Cu | 2.367630  | -1.991427 | 0.720867  |
| Cl | 3.547392  | -3.752883 | 0.532769  |
| C  | 1.161433  | -0.496270 | 0.966032  |
| C  | 0.011730  | -0.493425 | 1.878370  |
| C  | -1.138420 | 0.254219  | 1.590081  |
| C  | -2.232353 | 0.211850  | 2.451767  |
| C  | -2.201541 | -0.572621 | 3.597630  |
| C  | -1.061016 | -1.310701 | 3.894376  |
| C  | 0.031942  | -1.268677 | 3.040729  |
| C  | -1.243033 | 1.059539  | 0.326085  |
| N  | 0.010619  | 1.714294  | -0.082860 |
| C  | 0.397072  | 2.933474  | 0.567159  |

|   |           |           |           |
|---|-----------|-----------|-----------|
| C | 1.165942  | 3.838860  | -0.161478 |
| C | 1.637935  | 4.992964  | 0.446288  |
| C | 1.342751  | 5.256122  | 1.779556  |
| C | 0.568624  | 4.354487  | 2.498320  |
| C | 0.094357  | 3.191801  | 1.900891  |
| P | -1.803765 | 0.073562  | -1.185742 |
| O | -1.294378 | 0.827656  | -2.383167 |
| C | -1.159582 | -1.612780 | -1.096630 |
| C | -0.296677 | -1.981353 | -2.129661 |
| C | 0.359710  | -3.202984 | -2.088602 |
| C | 0.158147  | -4.065365 | -1.018274 |
| C | -0.725626 | -3.717024 | -0.003541 |
| C | -1.384362 | -2.496463 | -0.037865 |
| C | -3.615088 | 0.086898  | -1.079551 |
| C | -4.271251 | 0.952324  | -1.957332 |
| C | -5.656317 | 1.055719  | -1.925029 |
| C | -6.390374 | 0.300310  | -1.018908 |
| C | -5.740130 | -0.566005 | -0.146702 |
| C | -4.356466 | -0.677270 | -0.176687 |
| H | 0.919548  | -1.854662 | 3.254245  |
| H | -1.024121 | -1.922295 | 4.789124  |
| H | -3.060197 | -0.599161 | 4.257295  |
| H | -3.117341 | 0.797186  | 2.218195  |
| H | -3.686902 | 1.527683  | -2.665976 |
| H | -6.161429 | 1.724931  | -2.611908 |
| H | -7.471254 | 0.381246  | -0.995095 |
| H | -6.311671 | -1.162518 | 0.554995  |
| H | -3.868985 | -1.362346 | 0.504364  |
| H | -2.024787 | -2.228850 | 0.792946  |
| H | -0.874924 | -4.382498 | 0.838401  |
| H | 0.713348  | -4.992809 | -0.958140 |
| H | 1.054558  | -3.469699 | -2.875510 |
| H | -0.127844 | -1.295459 | -2.951615 |
| H | 1.406365  | 3.631738  | -1.199215 |

|   |           |          |           |
|---|-----------|----------|-----------|
| H | 2.239994  | 5.688495 | -0.127176 |
| H | 1.713921  | 6.156969 | 2.253637  |
| H | 0.332982  | 4.547609 | 3.537857  |
| H | -0.486717 | 2.489142 | 2.483976  |
| H | 3.914154  | 1.110788 | 0.589212  |
| H | 5.593360  | 2.009650 | -0.999711 |
| H | 5.019339  | 2.254789 | -3.396796 |
| H | 2.776394  | 1.577135 | -4.205764 |
| H | 1.105768  | 0.686242 | -2.624952 |
| H | -2.020715 | 1.823507 | 0.443542  |
| H | -0.048546 | 1.857891 | -1.095046 |

64

TS-2 in the presence of CuCl  $E(\omega\text{B97X-D/6-311+G}^{**}) = -3845.138929$

|    |           |           |           |
|----|-----------|-----------|-----------|
| C  | 2.092152  | 0.966721  | -2.270754 |
| C  | 2.408566  | 0.836422  | -0.914903 |
| C  | 3.676841  | 1.216529  | -0.462710 |
| C  | 4.612257  | 1.719326  | -1.356154 |
| C  | 4.289096  | 1.856119  | -2.701533 |
| C  | 3.029769  | 1.477891  | -3.156395 |
| C  | 1.415099  | 0.369074  | 0.042707  |
| Cu | 2.367630  | -1.991427 | 0.720867  |
| Cl | 3.547392  | -3.752883 | 0.532769  |
| C  | 1.161433  | -0.496270 | 0.966032  |
| C  | 0.011730  | -0.493425 | 1.878370  |
| C  | -1.138420 | 0.254219  | 1.590081  |
| C  | -2.232353 | 0.211850  | 2.451767  |
| C  | -2.201541 | -0.572621 | 3.597630  |
| C  | -1.061016 | -1.310701 | 3.894376  |
| C  | 0.031942  | -1.268677 | 3.040729  |
| C  | -1.243033 | 1.059539  | 0.326085  |
| N  | 0.010619  | 1.714294  | -0.082860 |
| C  | 0.397072  | 2.933474  | 0.567159  |
| C  | 1.165942  | 3.838860  | -0.161478 |



|   |           |           |           |
|---|-----------|-----------|-----------|
| C | 1.637935  | 4.992964  | 0.446288  |
| C | 1.342751  | 5.256122  | 1.779556  |
| C | 0.568624  | 4.354487  | 2.498320  |
| C | 0.094357  | 3.191801  | 1.900891  |
| P | -1.803765 | 0.073562  | -1.185742 |
| O | -1.294378 | 0.827656  | -2.383167 |
| C | -1.159582 | -1.612780 | -1.096630 |
| C | -0.296677 | -1.981353 | -2.129661 |
| C | 0.359710  | -3.202984 | -2.088602 |
| C | 0.158147  | -4.065365 | -1.018274 |
| C | -0.725626 | -3.717024 | -0.003541 |
| C | -1.384362 | -2.496463 | -0.037865 |
| C | -3.615088 | 0.086898  | -1.079551 |
| C | -4.271251 | 0.952324  | -1.957332 |
| C | -5.656317 | 1.055719  | -1.925029 |
| C | -6.390374 | 0.300310  | -1.018908 |
| C | -5.740130 | -0.566005 | -0.146702 |
| C | -4.356466 | -0.677270 | -0.176687 |
| H | 0.919548  | -1.854662 | 3.254245  |
| H | -1.024121 | -1.922295 | 4.789124  |
| H | -3.060197 | -0.599161 | 4.257295  |
| H | -3.117341 | 0.797186  | 2.218195  |
| H | -3.686902 | 1.527683  | -2.665976 |
| H | -6.161429 | 1.724931  | -2.611908 |
| H | -7.471254 | 0.381246  | -0.995095 |
| H | -6.311671 | -1.162518 | 0.554995  |
| H | -3.868985 | -1.362346 | 0.504364  |
| H | -2.024787 | -2.228850 | 0.792946  |
| H | -0.874924 | -4.382498 | 0.838401  |
| H | 0.713348  | -4.992809 | -0.958140 |
| H | 1.054558  | -3.469699 | -2.875510 |
| H | -0.127844 | -1.295459 | -2.951615 |
| H | 1.406365  | 3.631738  | -1.199215 |
| H | 2.239994  | 5.688495  | -0.127176 |

|   |           |          |           |
|---|-----------|----------|-----------|
| H | 1.713921  | 6.156969 | 2.253637  |
| H | 0.332982  | 4.547609 | 3.537857  |
| H | -0.486717 | 2.489142 | 2.483976  |
| H | 3.914154  | 1.110788 | 0.589212  |
| H | 5.593360  | 2.009650 | -0.999711 |
| H | 5.019339  | 2.254789 | -3.396796 |
| H | 2.776394  | 1.577135 | -4.205764 |
| H | 1.105768  | 0.686242 | -2.624952 |
| H | -2.020715 | 1.823507 | 0.443542  |
| H | -0.048546 | 1.857891 | -1.095046 |

## References

- 1 M. J. Frisch, G. W. Trucks, H. B. Schlegel, G. E. Scuseria, M. A. Robb, J. R. Cheeseman, G. Scalmani, V. Barone, G. A. Petersson, H. Nakatsuji, X. Li, M. Caricato, A. V. Marenich, J. Bloino, B. G. Janesko, R. Gomperts, B. Mennucci, H. P. Hratchian, J. V. Ortiz, A. F. Izmaylov, J. L. Sonnenberg, Williams, F. Ding, F. Lipparini, F. Egidi, J. Goings, B. Peng, A. Petrone, T. Henderson, D. Ranasinghe, V. G. Zakrzewski, J. Gao, N. Rega, G. Zheng, W. Liang, M. Hada, M. Ehara, K. Toyota, R. Fukuda, J. Hasegawa, M. Ishida, T. Nakajima, Y. Honda, O. Kitao, H. Nakai, T. Vreven, K. Throssell, J. A. Montgomery Jr., J. E. Peralta, F. Ogliaro, M. J. Bearpark, J. J. Heyd, E. N. Brothers, K. N. Kudin, V. N. Staroverov, T. A. Keith, R. Kobayashi, J. Normand, K. Raghavachari, A. P. Rendell, J. C. Burant, S. S. Iyengar, J. Tomasi, M. Cossi, J. M. Millam, M. Klene, C. Adamo, R. Cammi, J. W. Ochterski, R. L. Martin, K. Morokuma, O. Farkas, J. B. Foresman and D. J. Fox, Gaussian 16 Rev. C.01, Wallingford, CT, 2016, 12.
- 2 N. Popovics-Tóth, T. D. T. Bao, Á. Tajti, B. Mátravölgyi, Z. Kelemen, F. Perdih, L. Hackler, L. G. Puskás and E. Bálint, Three-Component Reaction of 3-Formyl-6-Methylchromone, Primary Amines, and Secondary Phosphine Oxides: A Synthetic and Mechanistic Study, *ACS Omega*, 2023, **8**, 2698–2711.
